# Supplementary material
Source: PubMed Central journal article supplement (PMC4831720)

**Supporting Information: Spectral Data**

**Aerobic Linear Allylic C–H Amination: Overcoming Benzoquinone Inhibition**

Christopher C. Pattillo<sup>‡</sup>, Iulia I. Strambeanu<sup>‡</sup>, Pilar Calleja<sup>v</sup>, Nicolaas A. Vermeulen<sup>t</sup>,  
Tomokazu Mizuno<sup>§</sup>, and M. Christina White<sup>‡,\*</sup>

*Roger Adams Laboratory, Department of Chemistry, University of Illinois, Urbana,  
Illinois 61801*

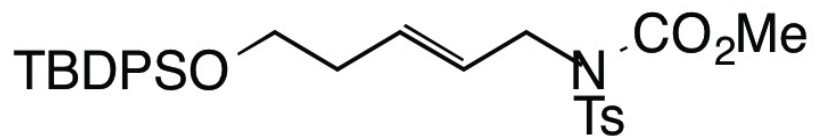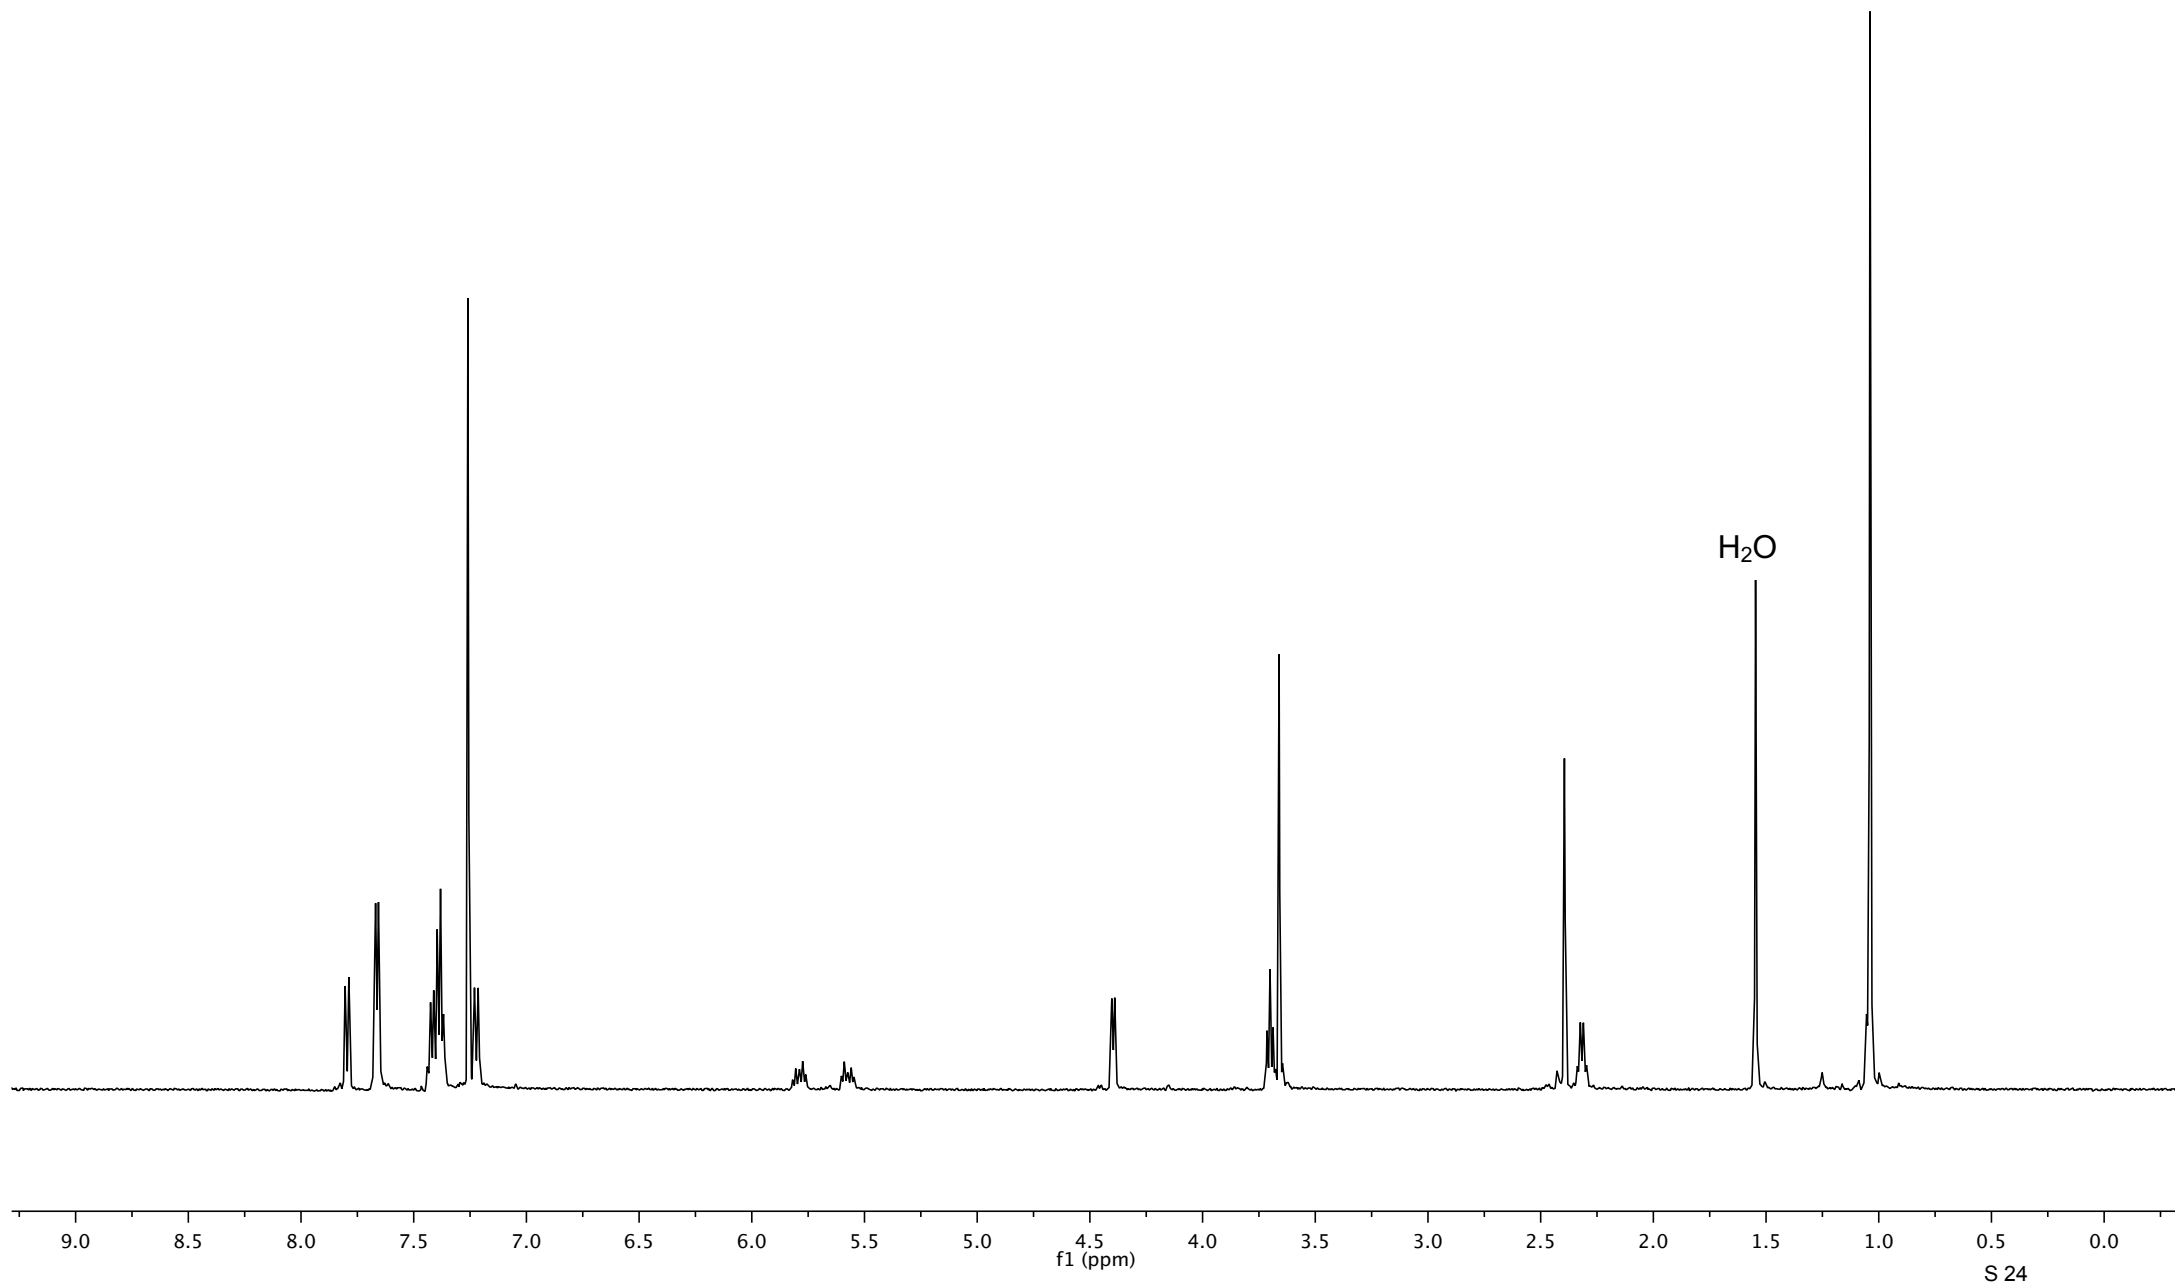

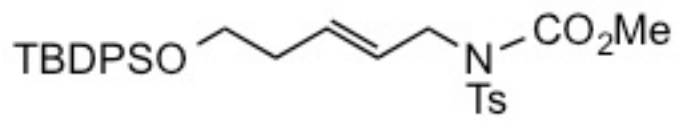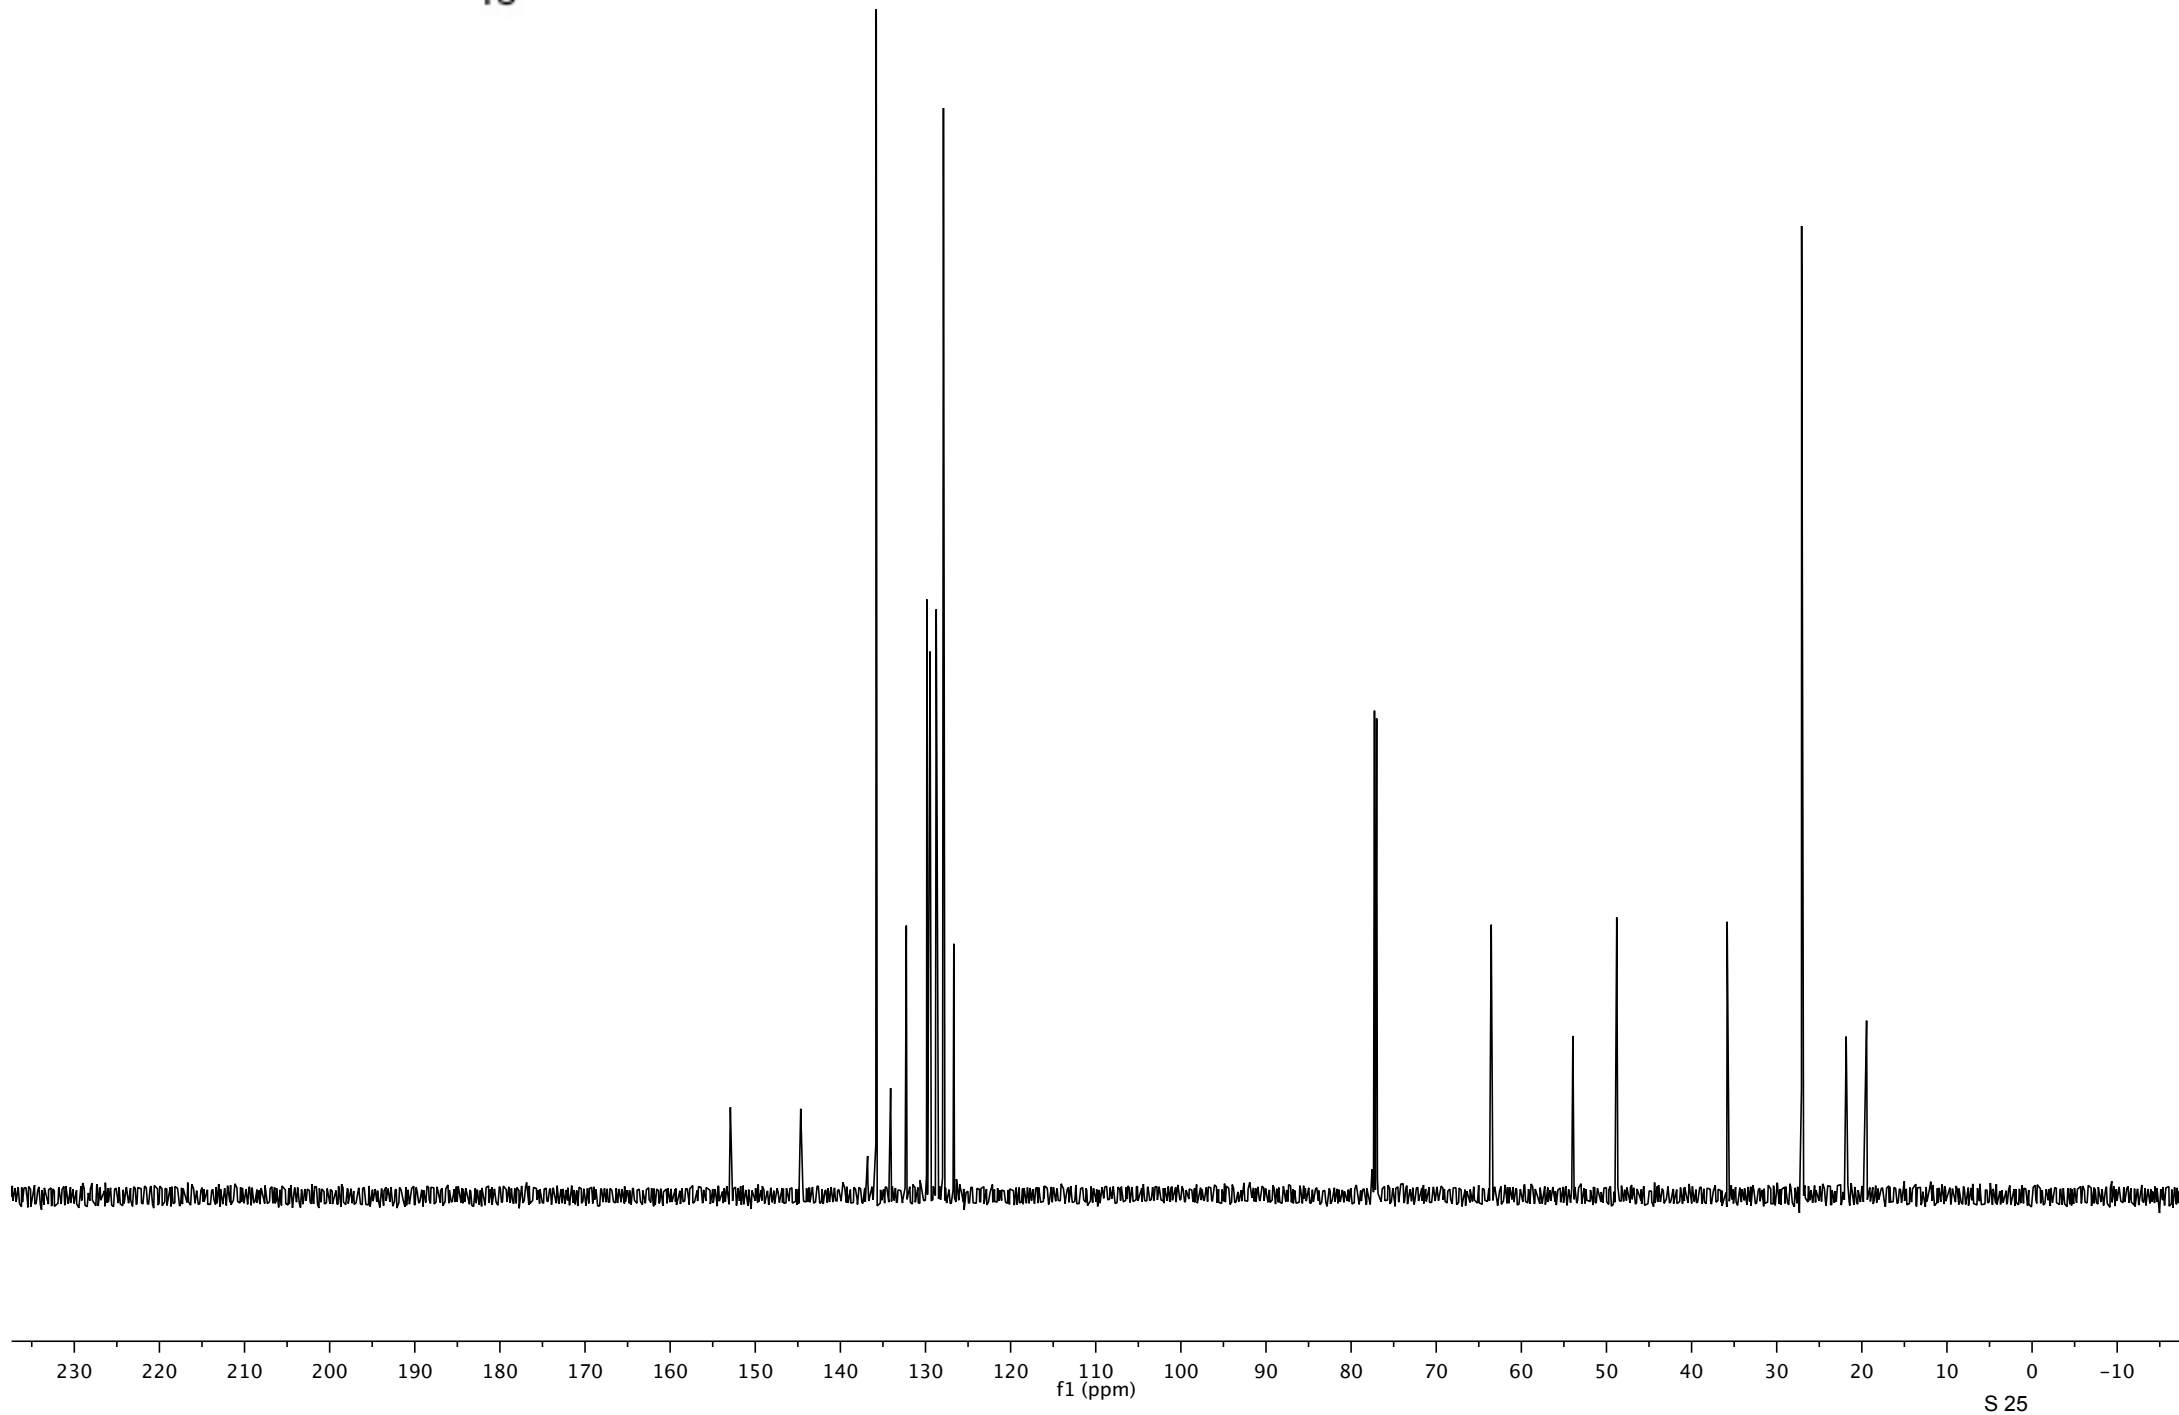

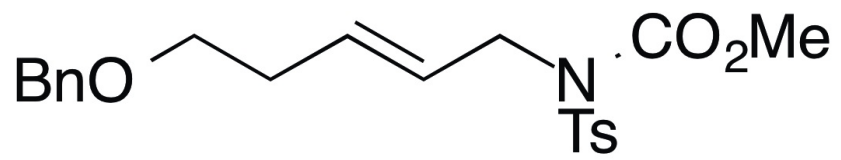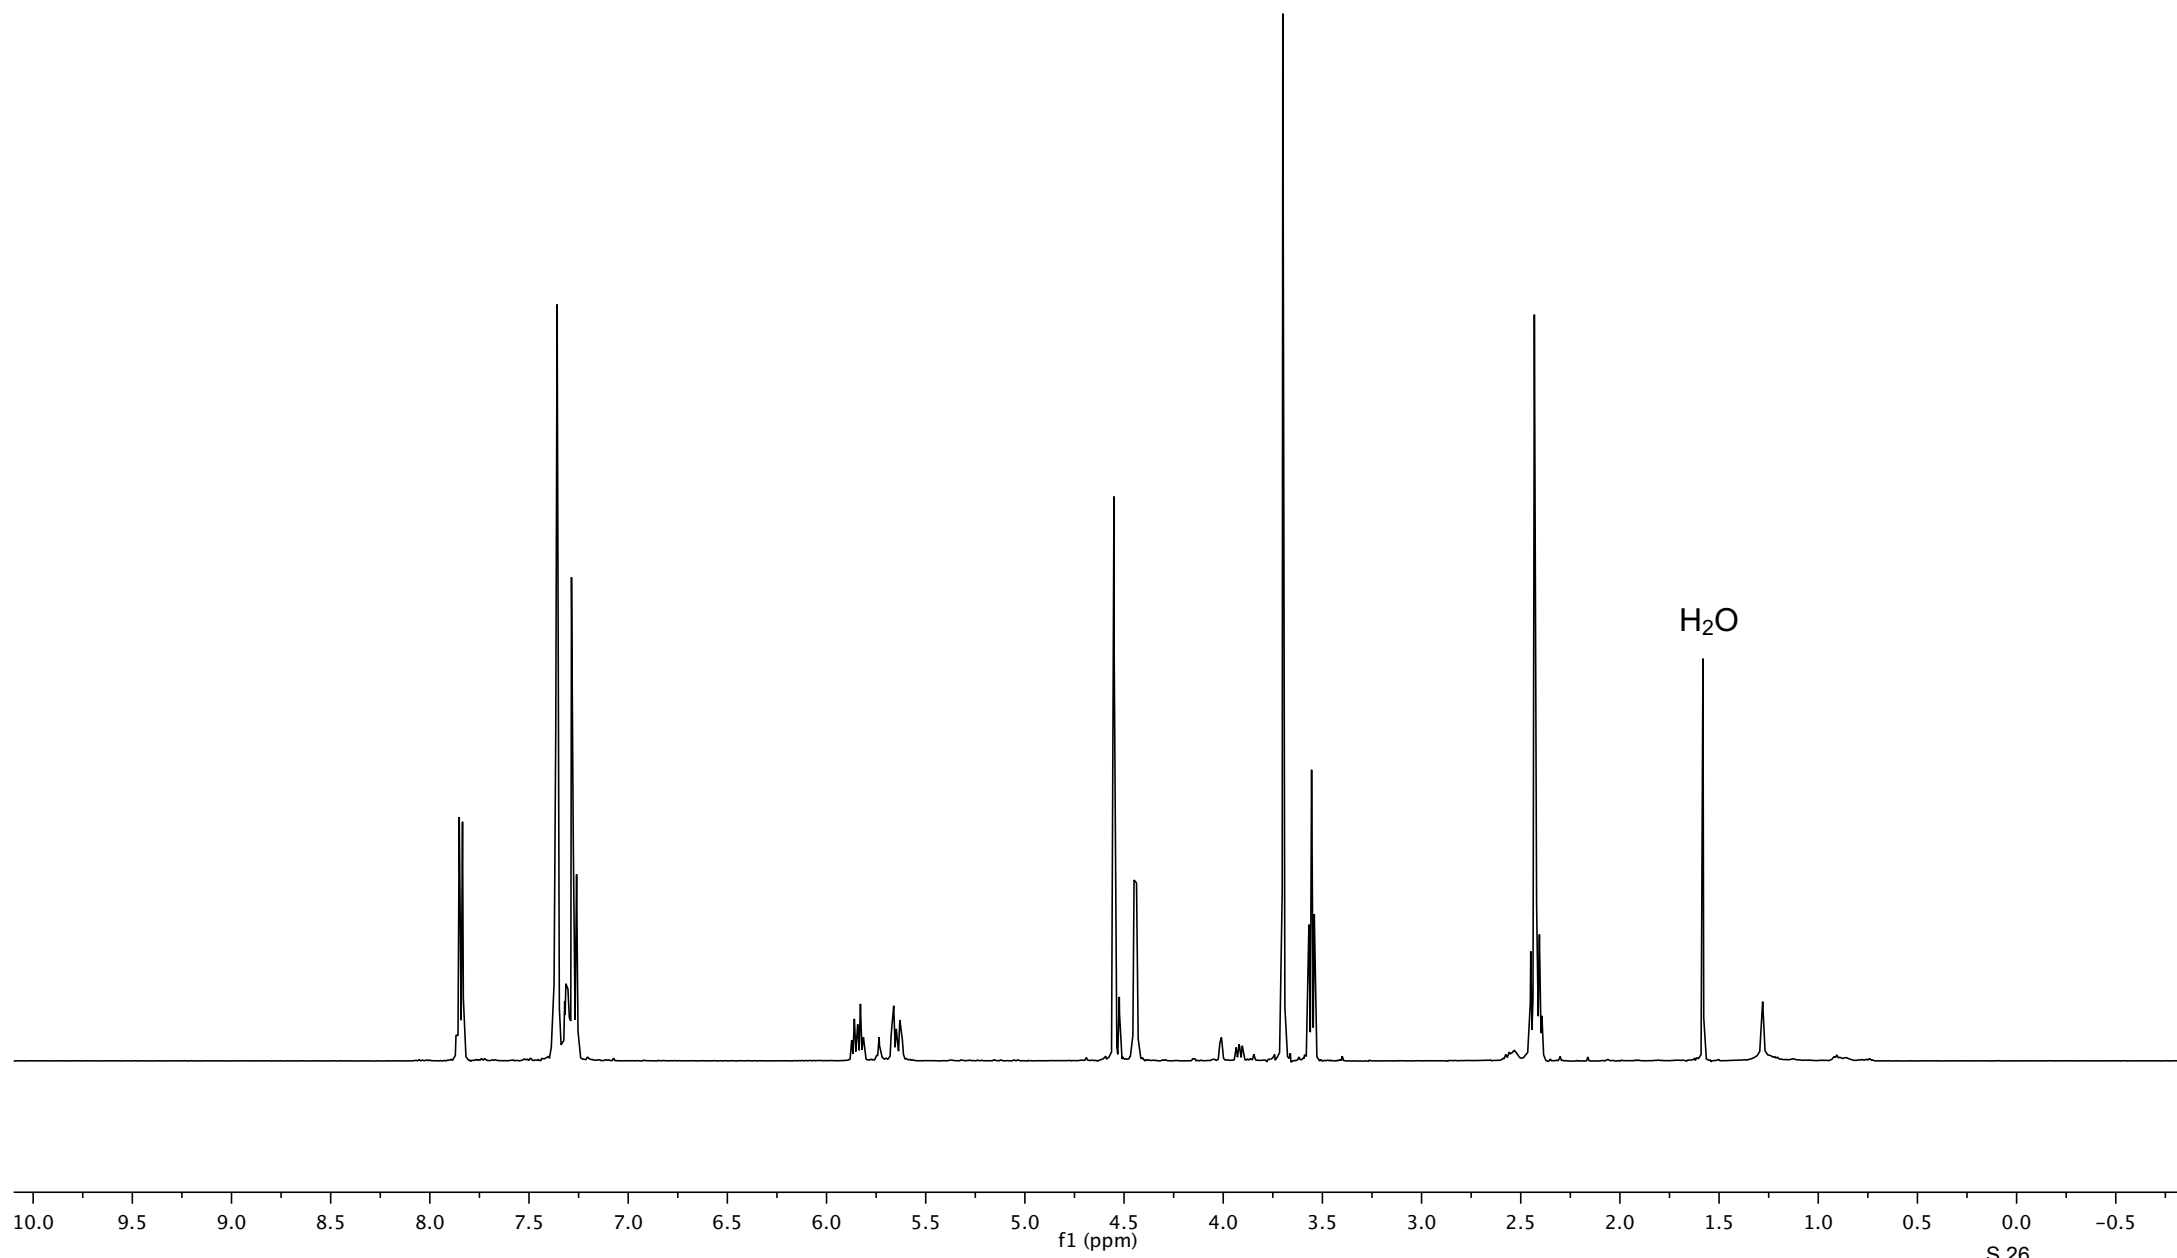

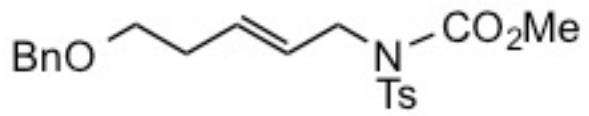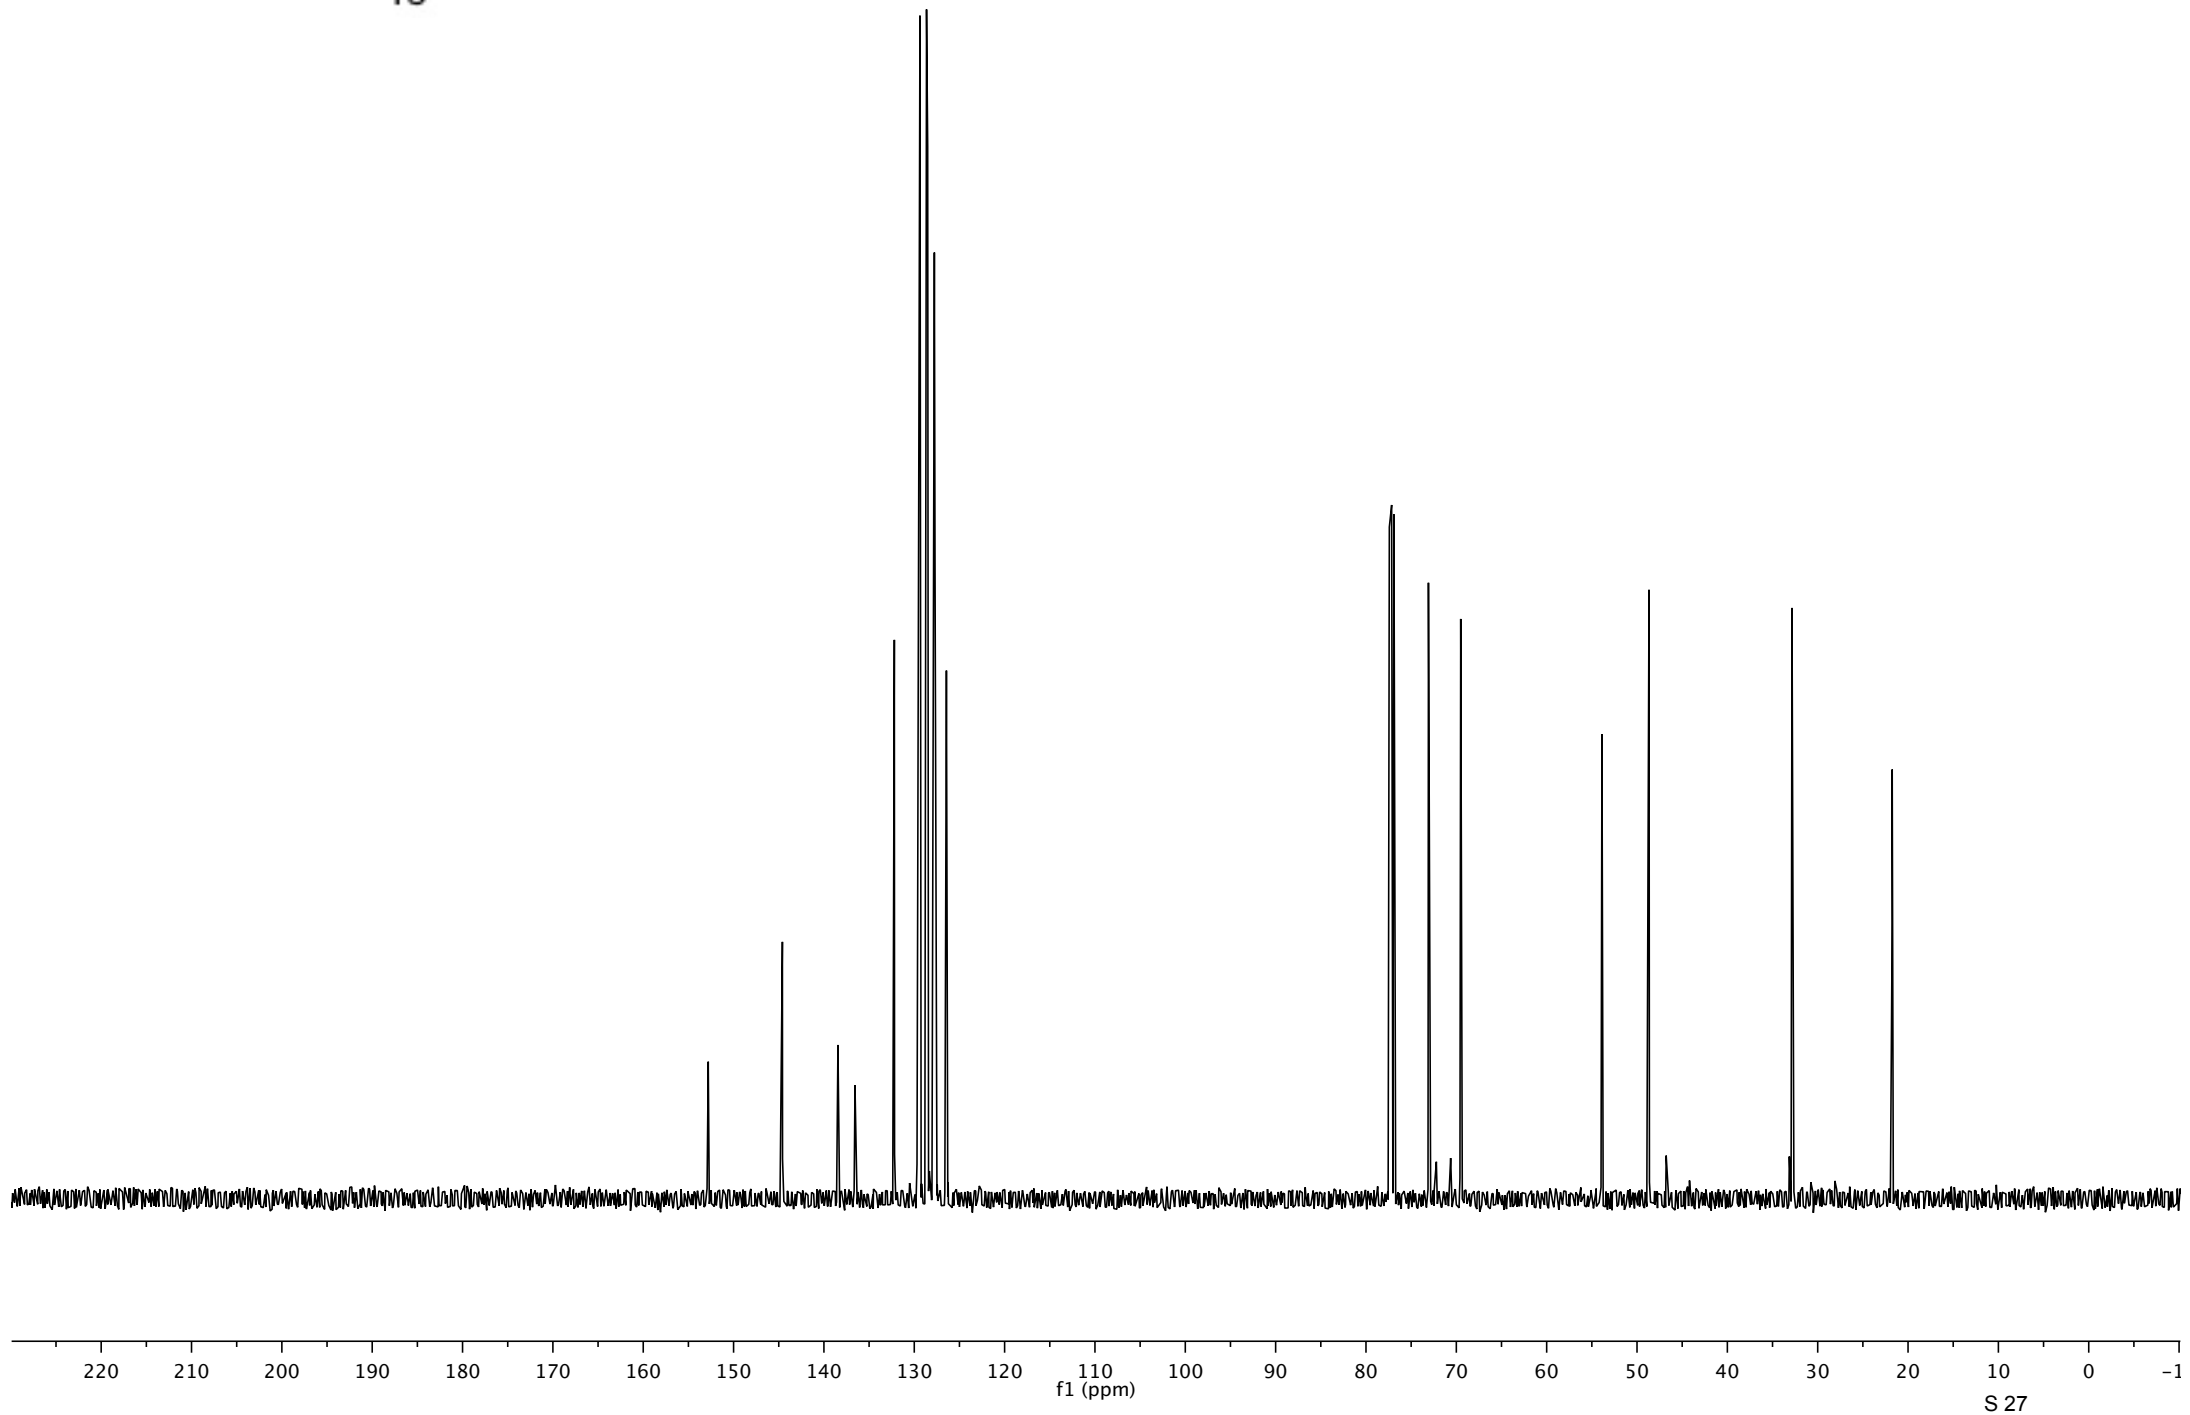

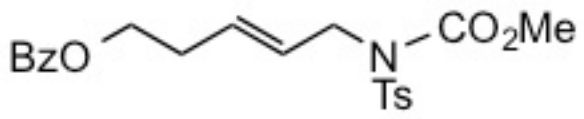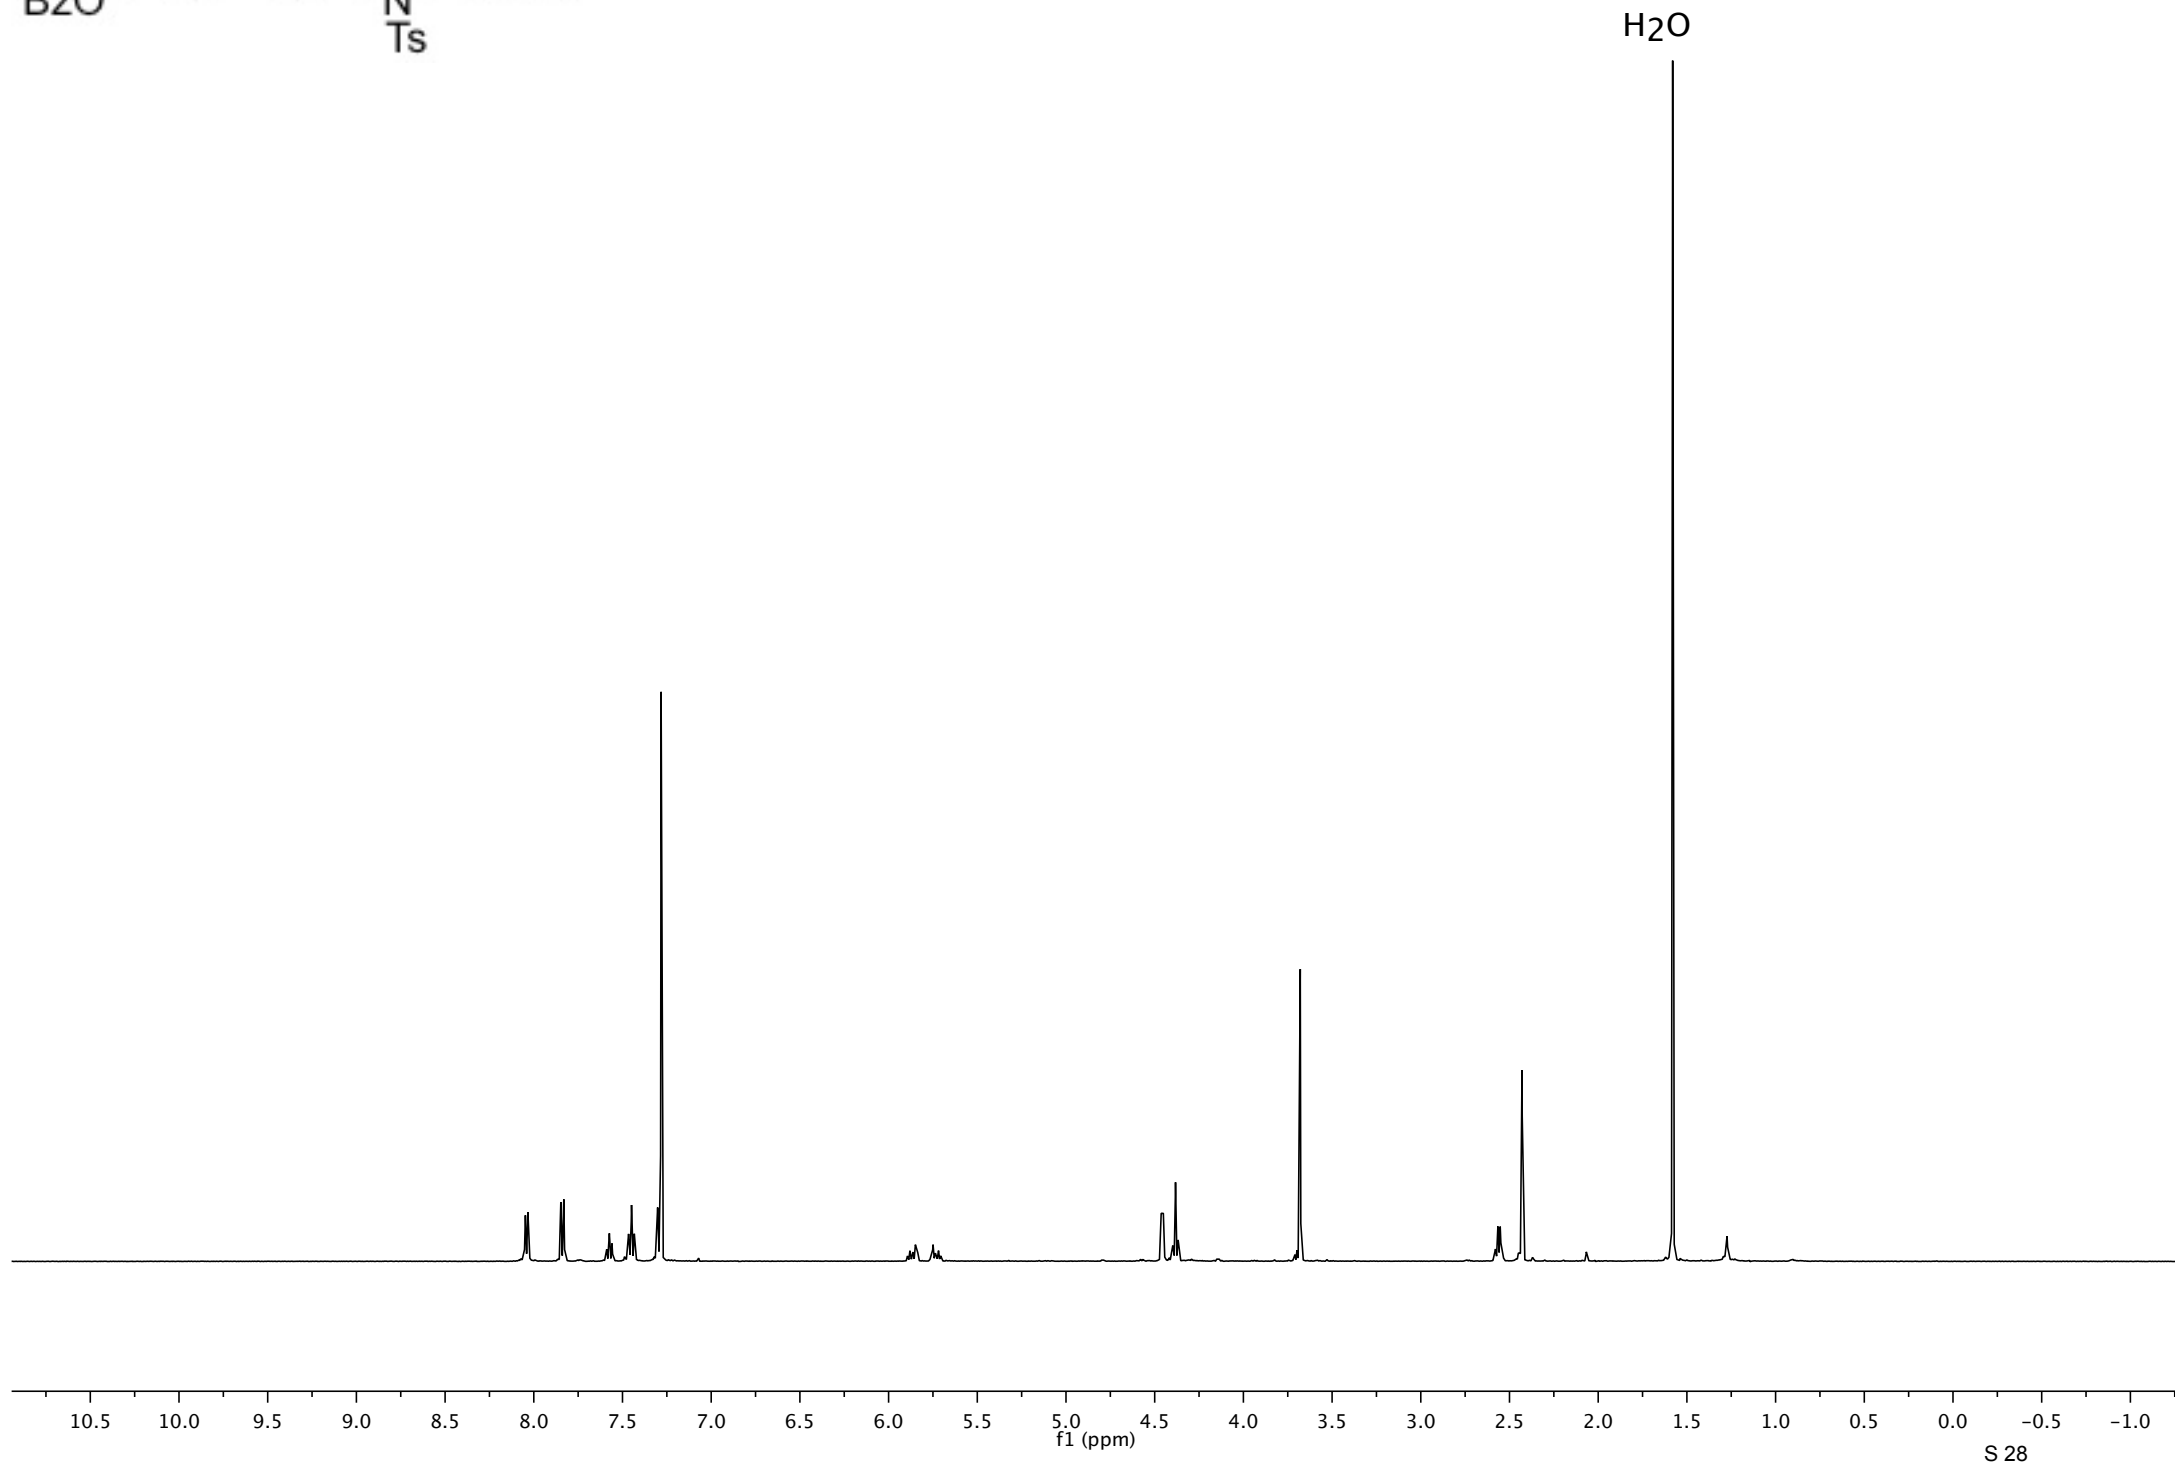

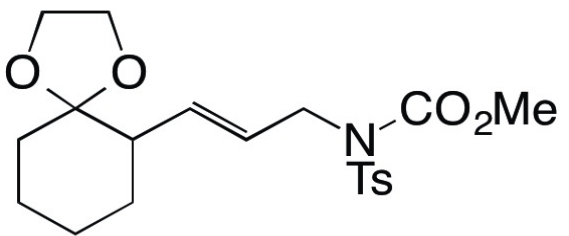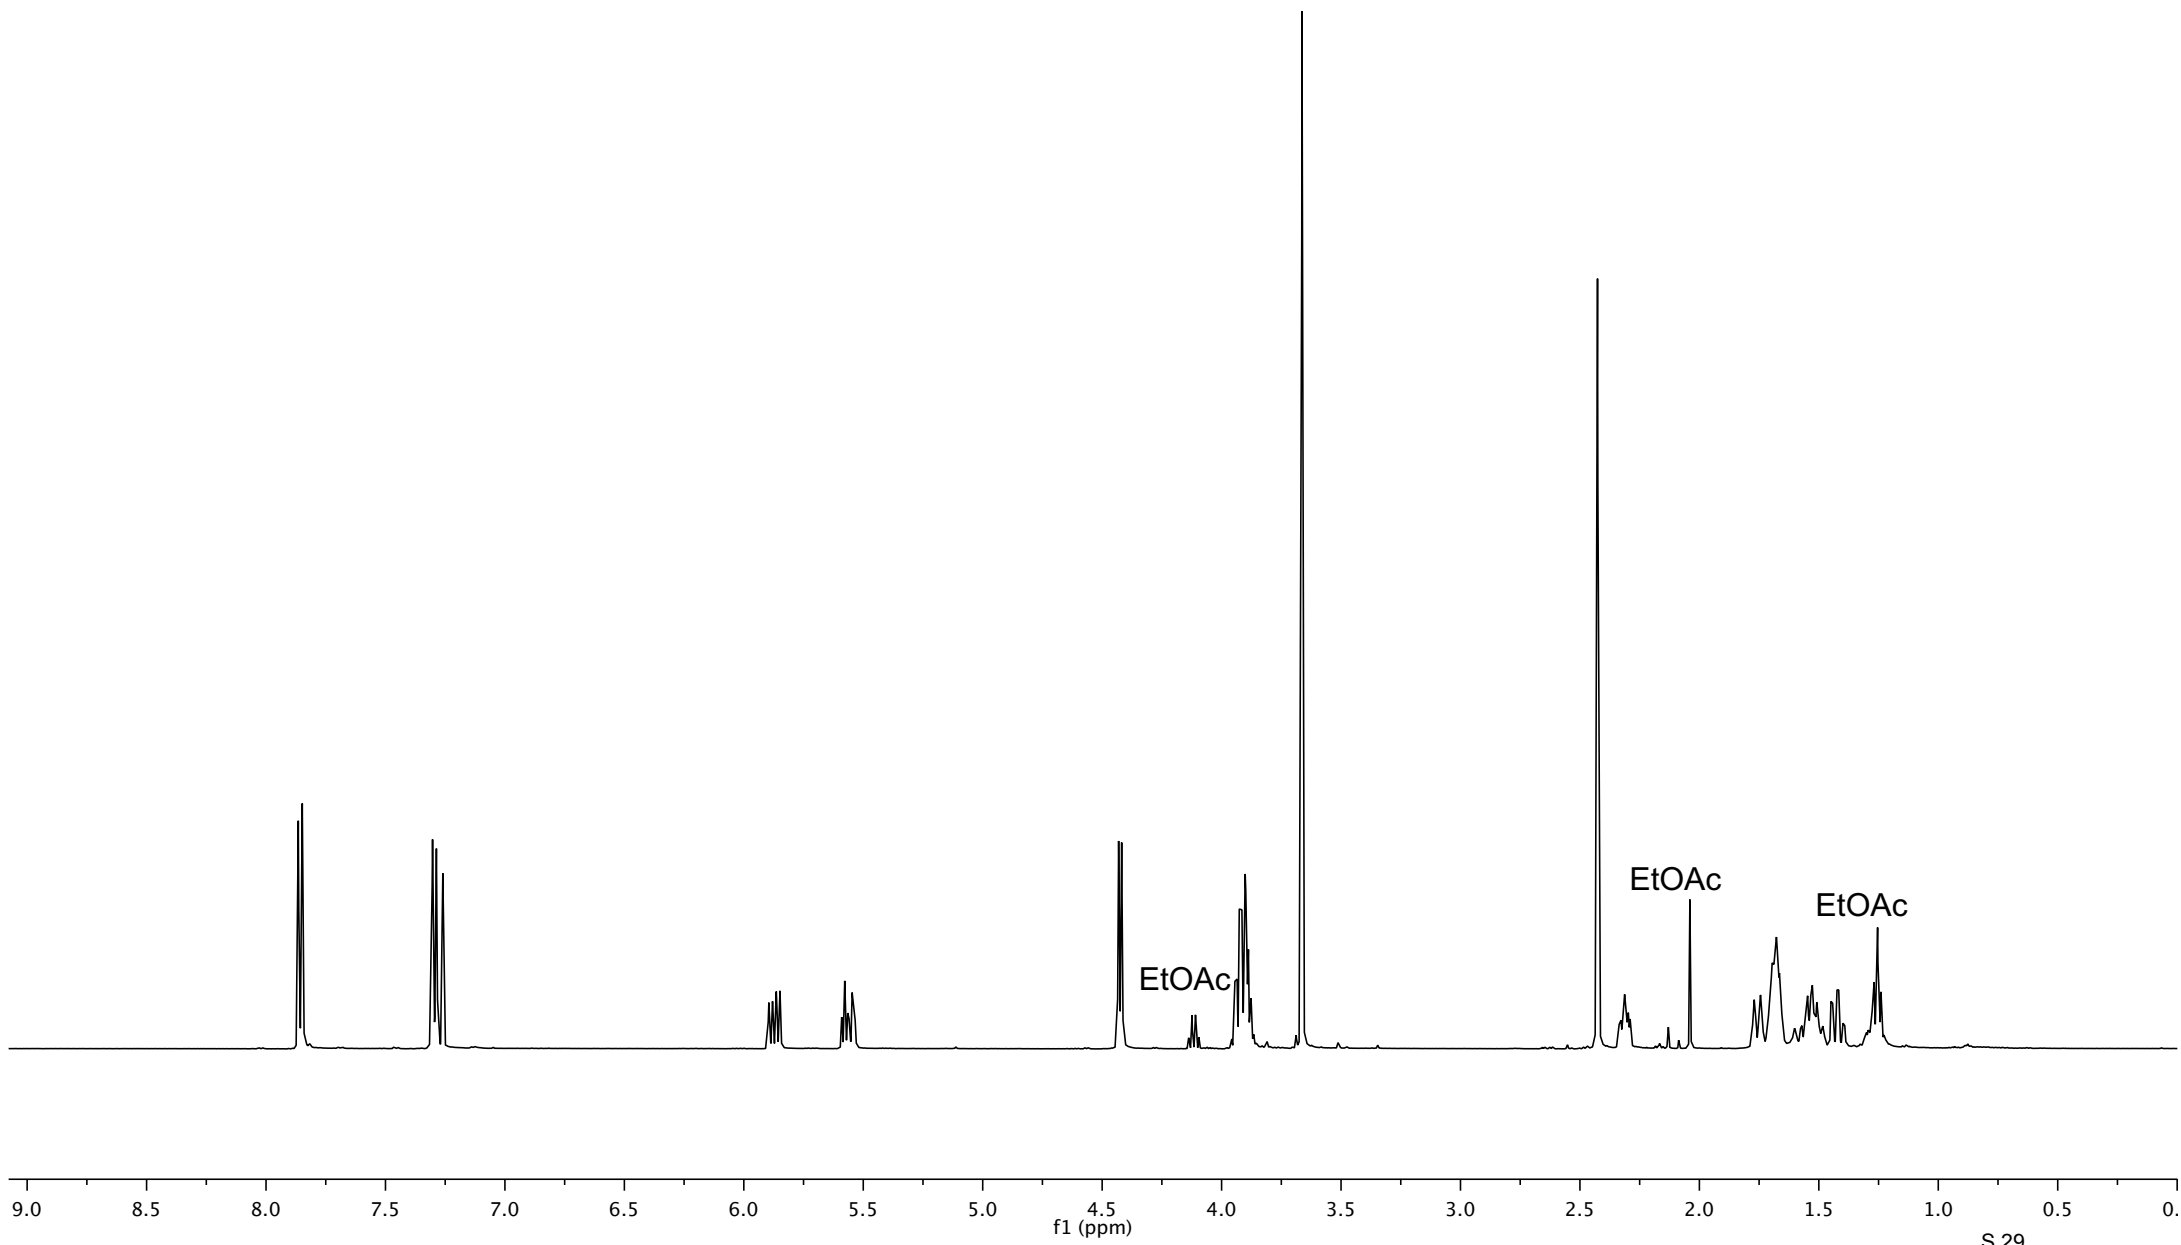

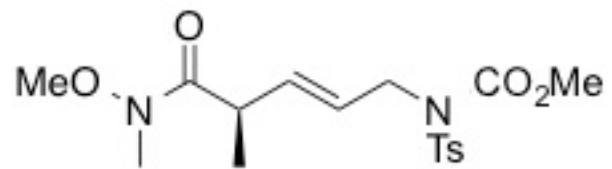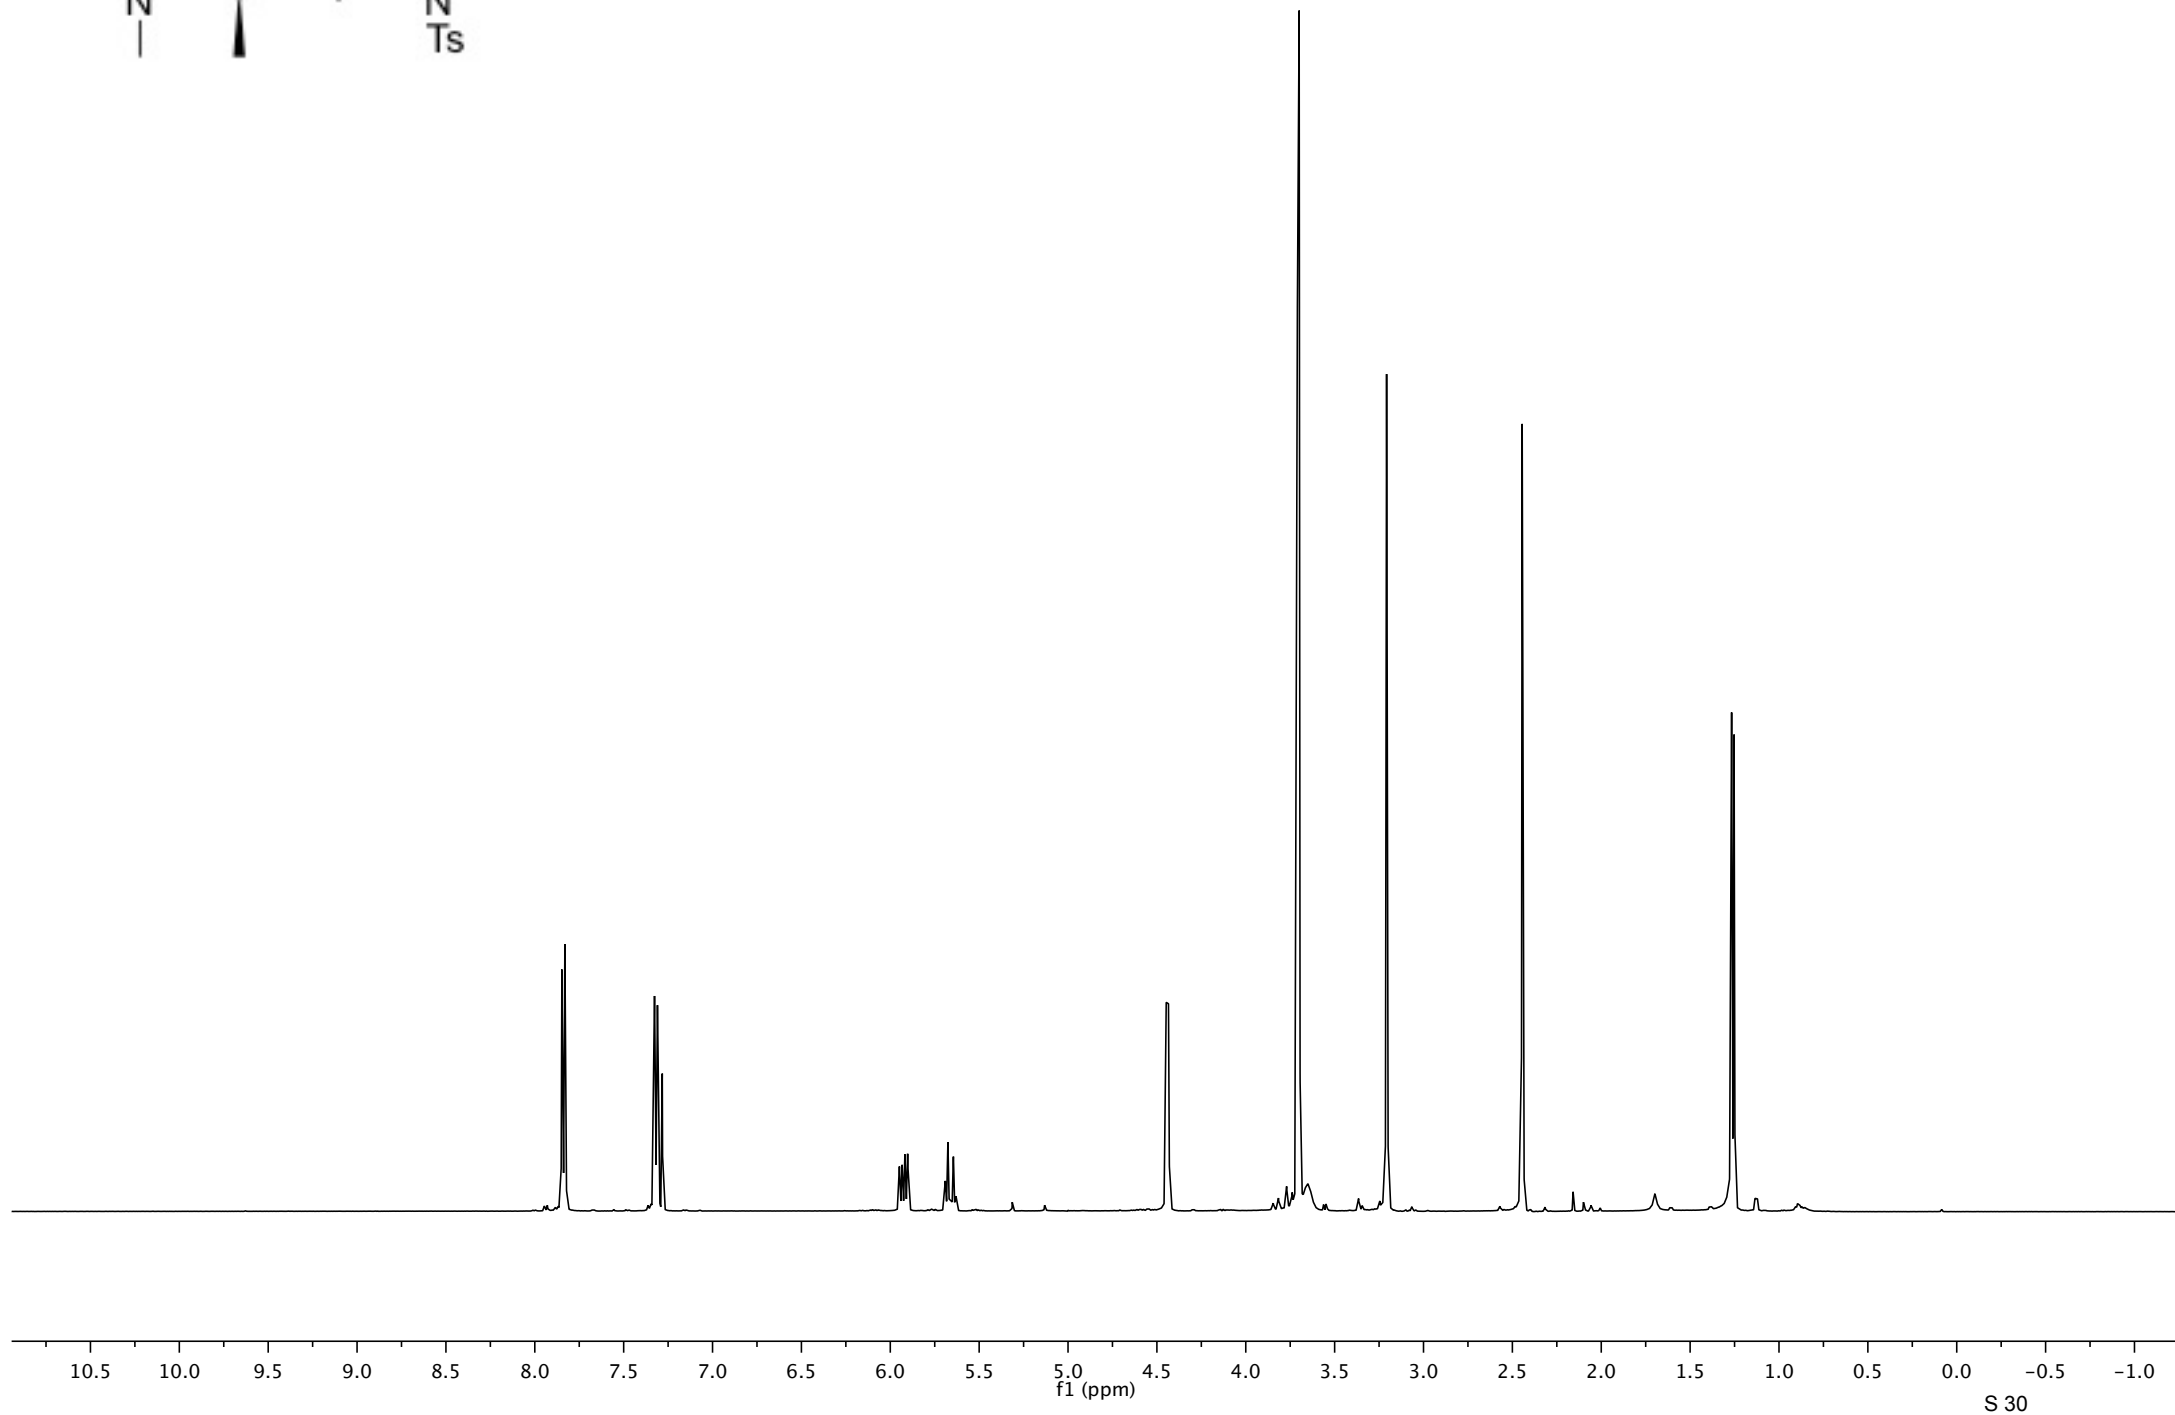



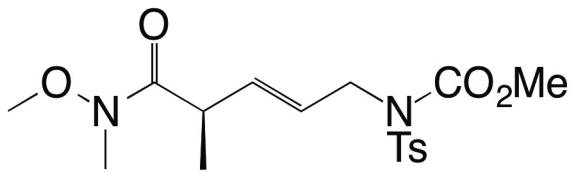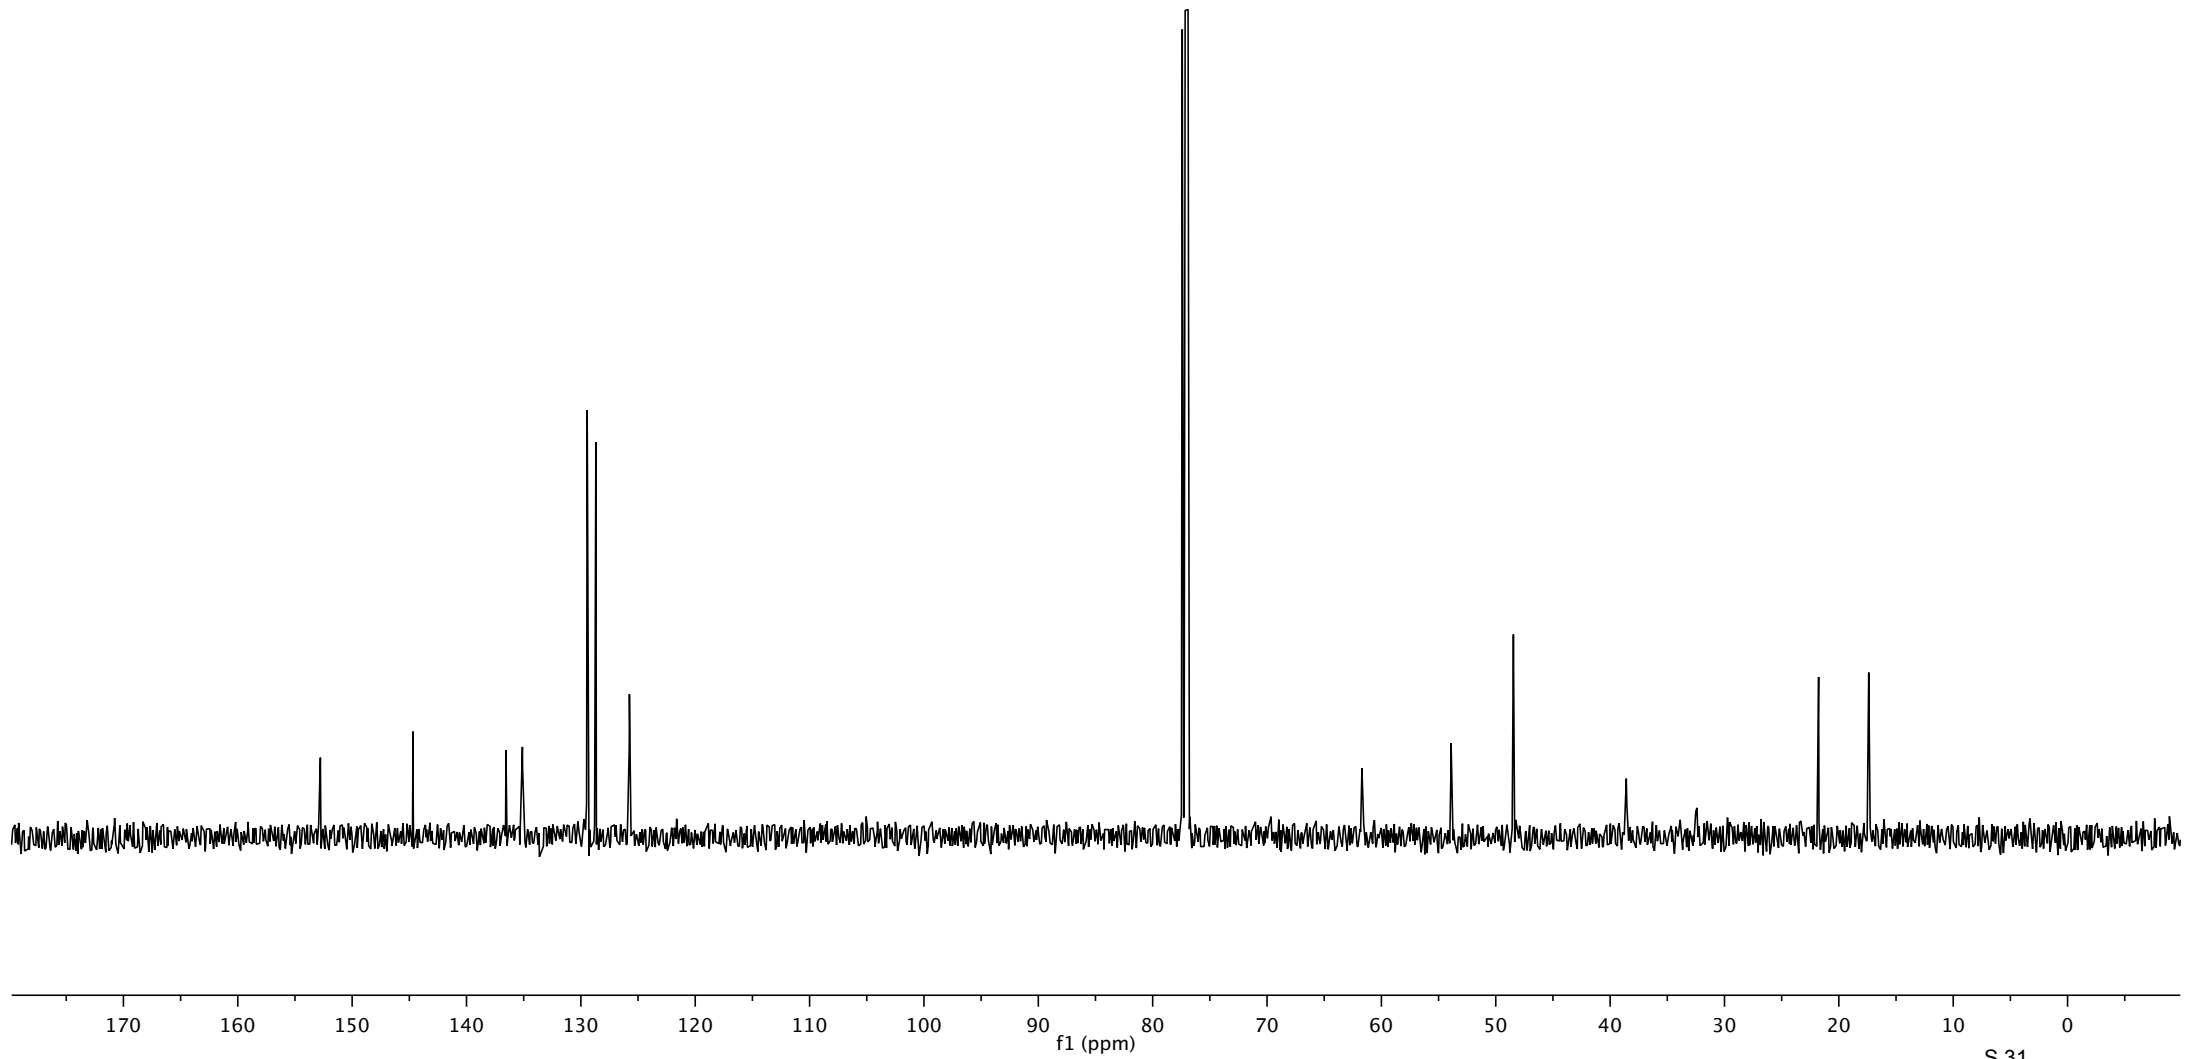

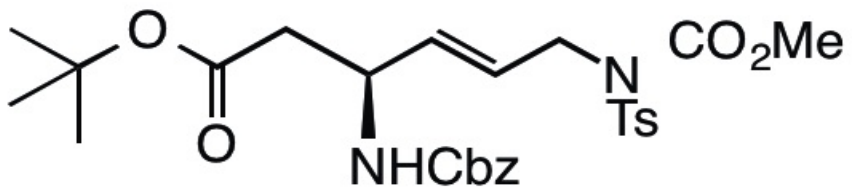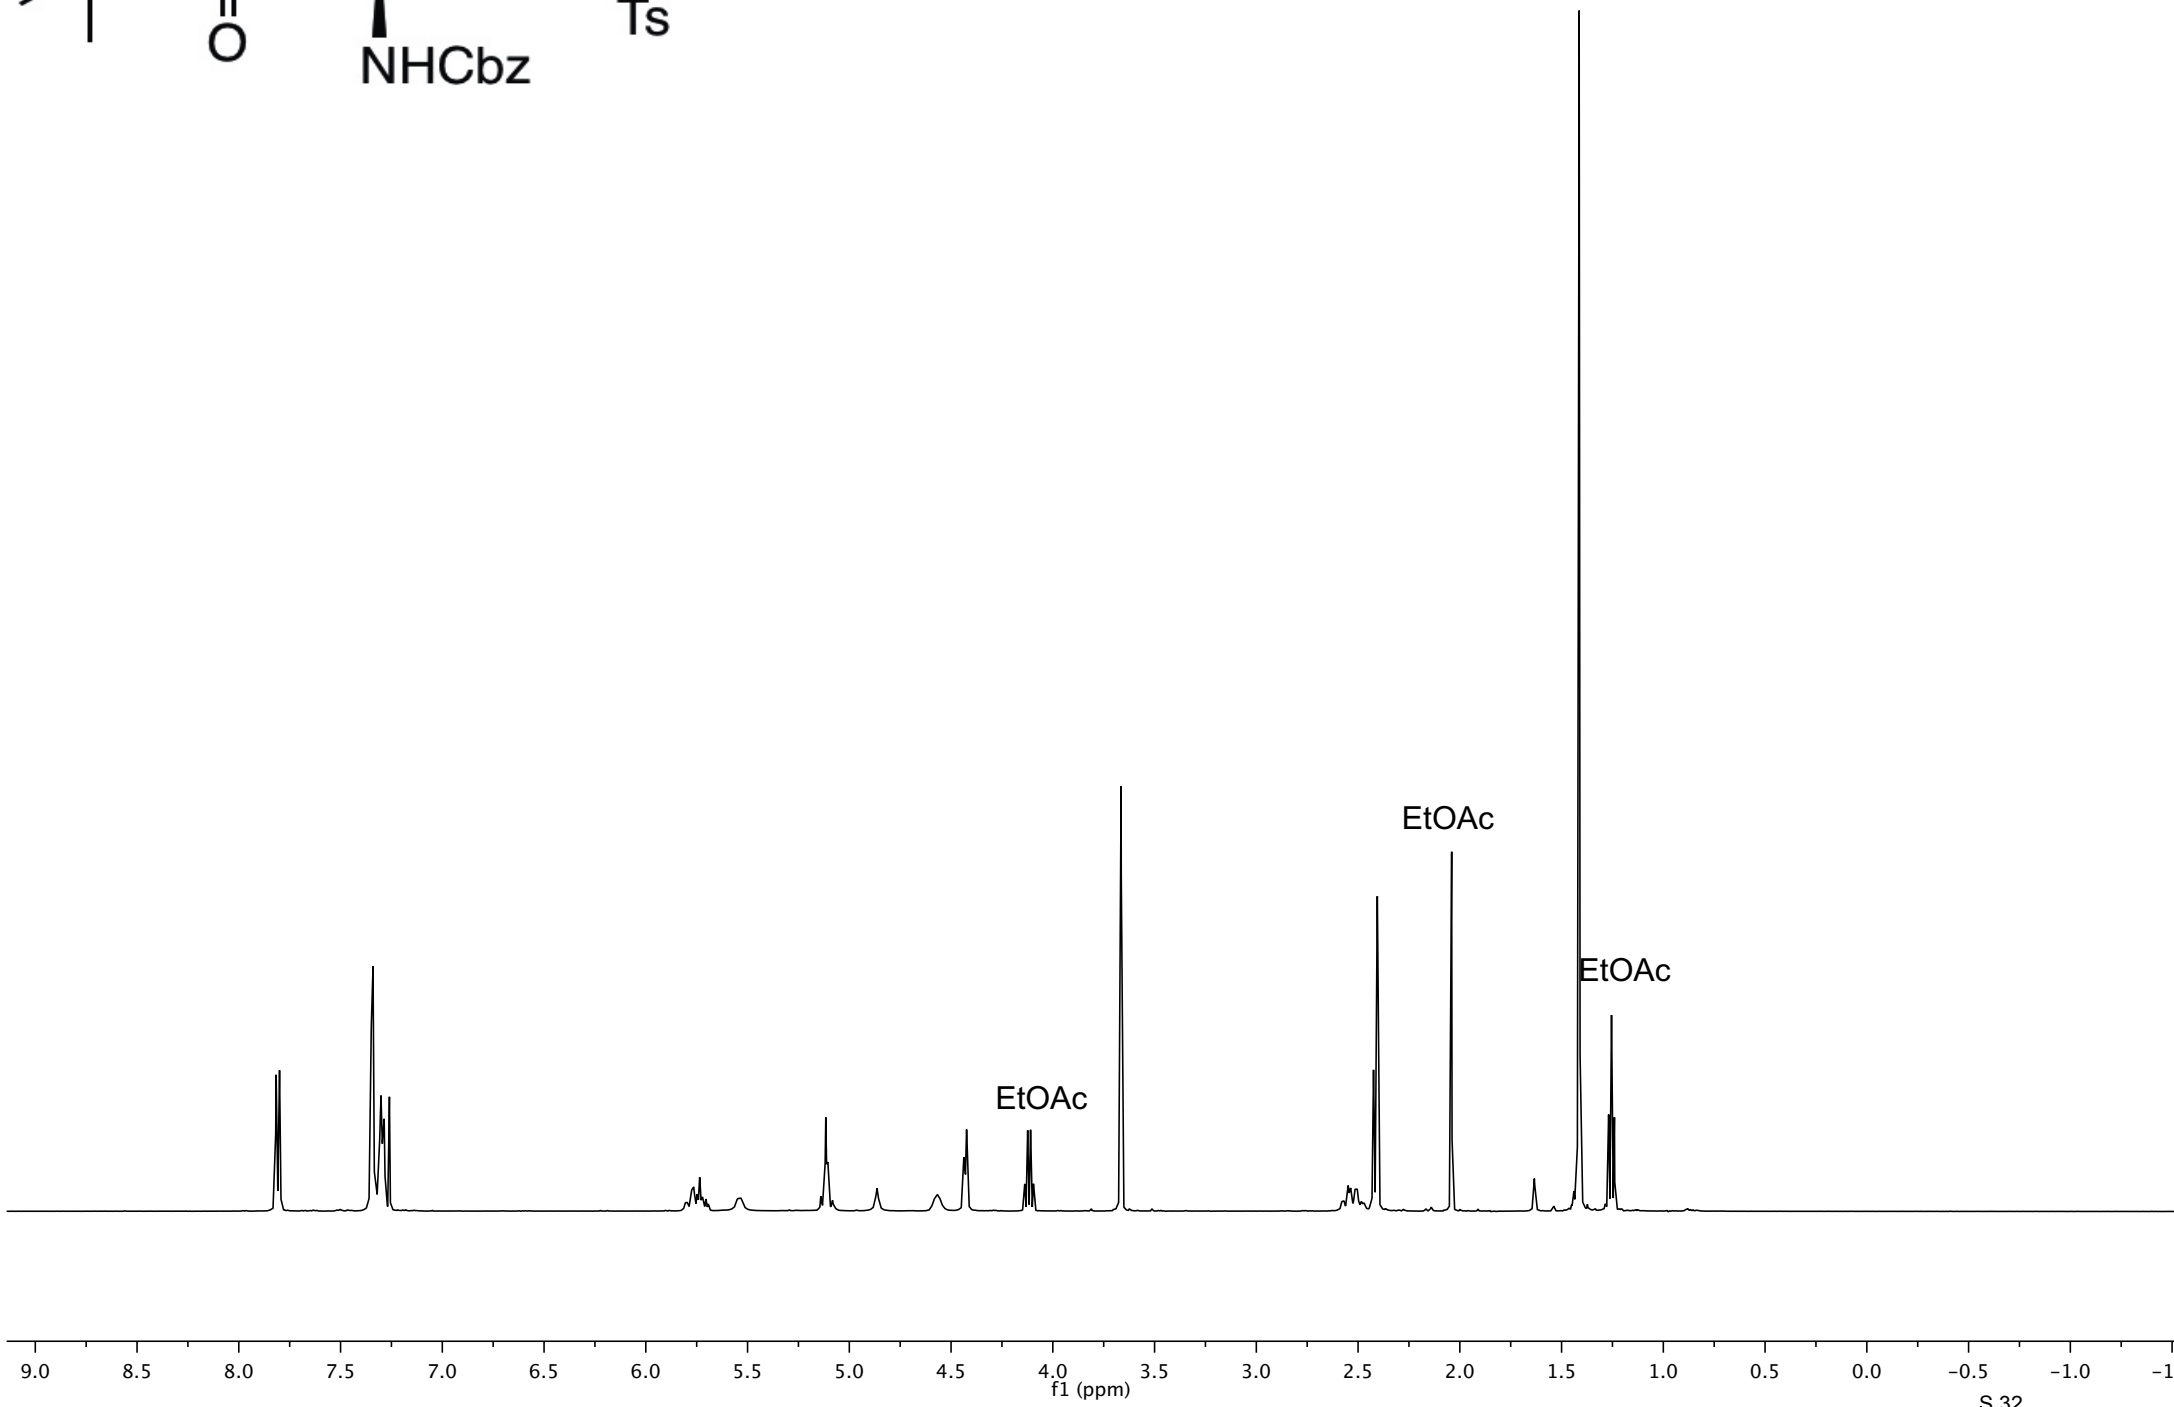





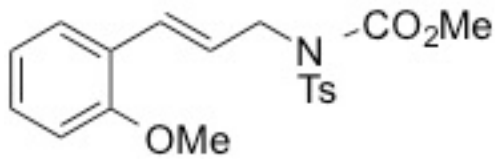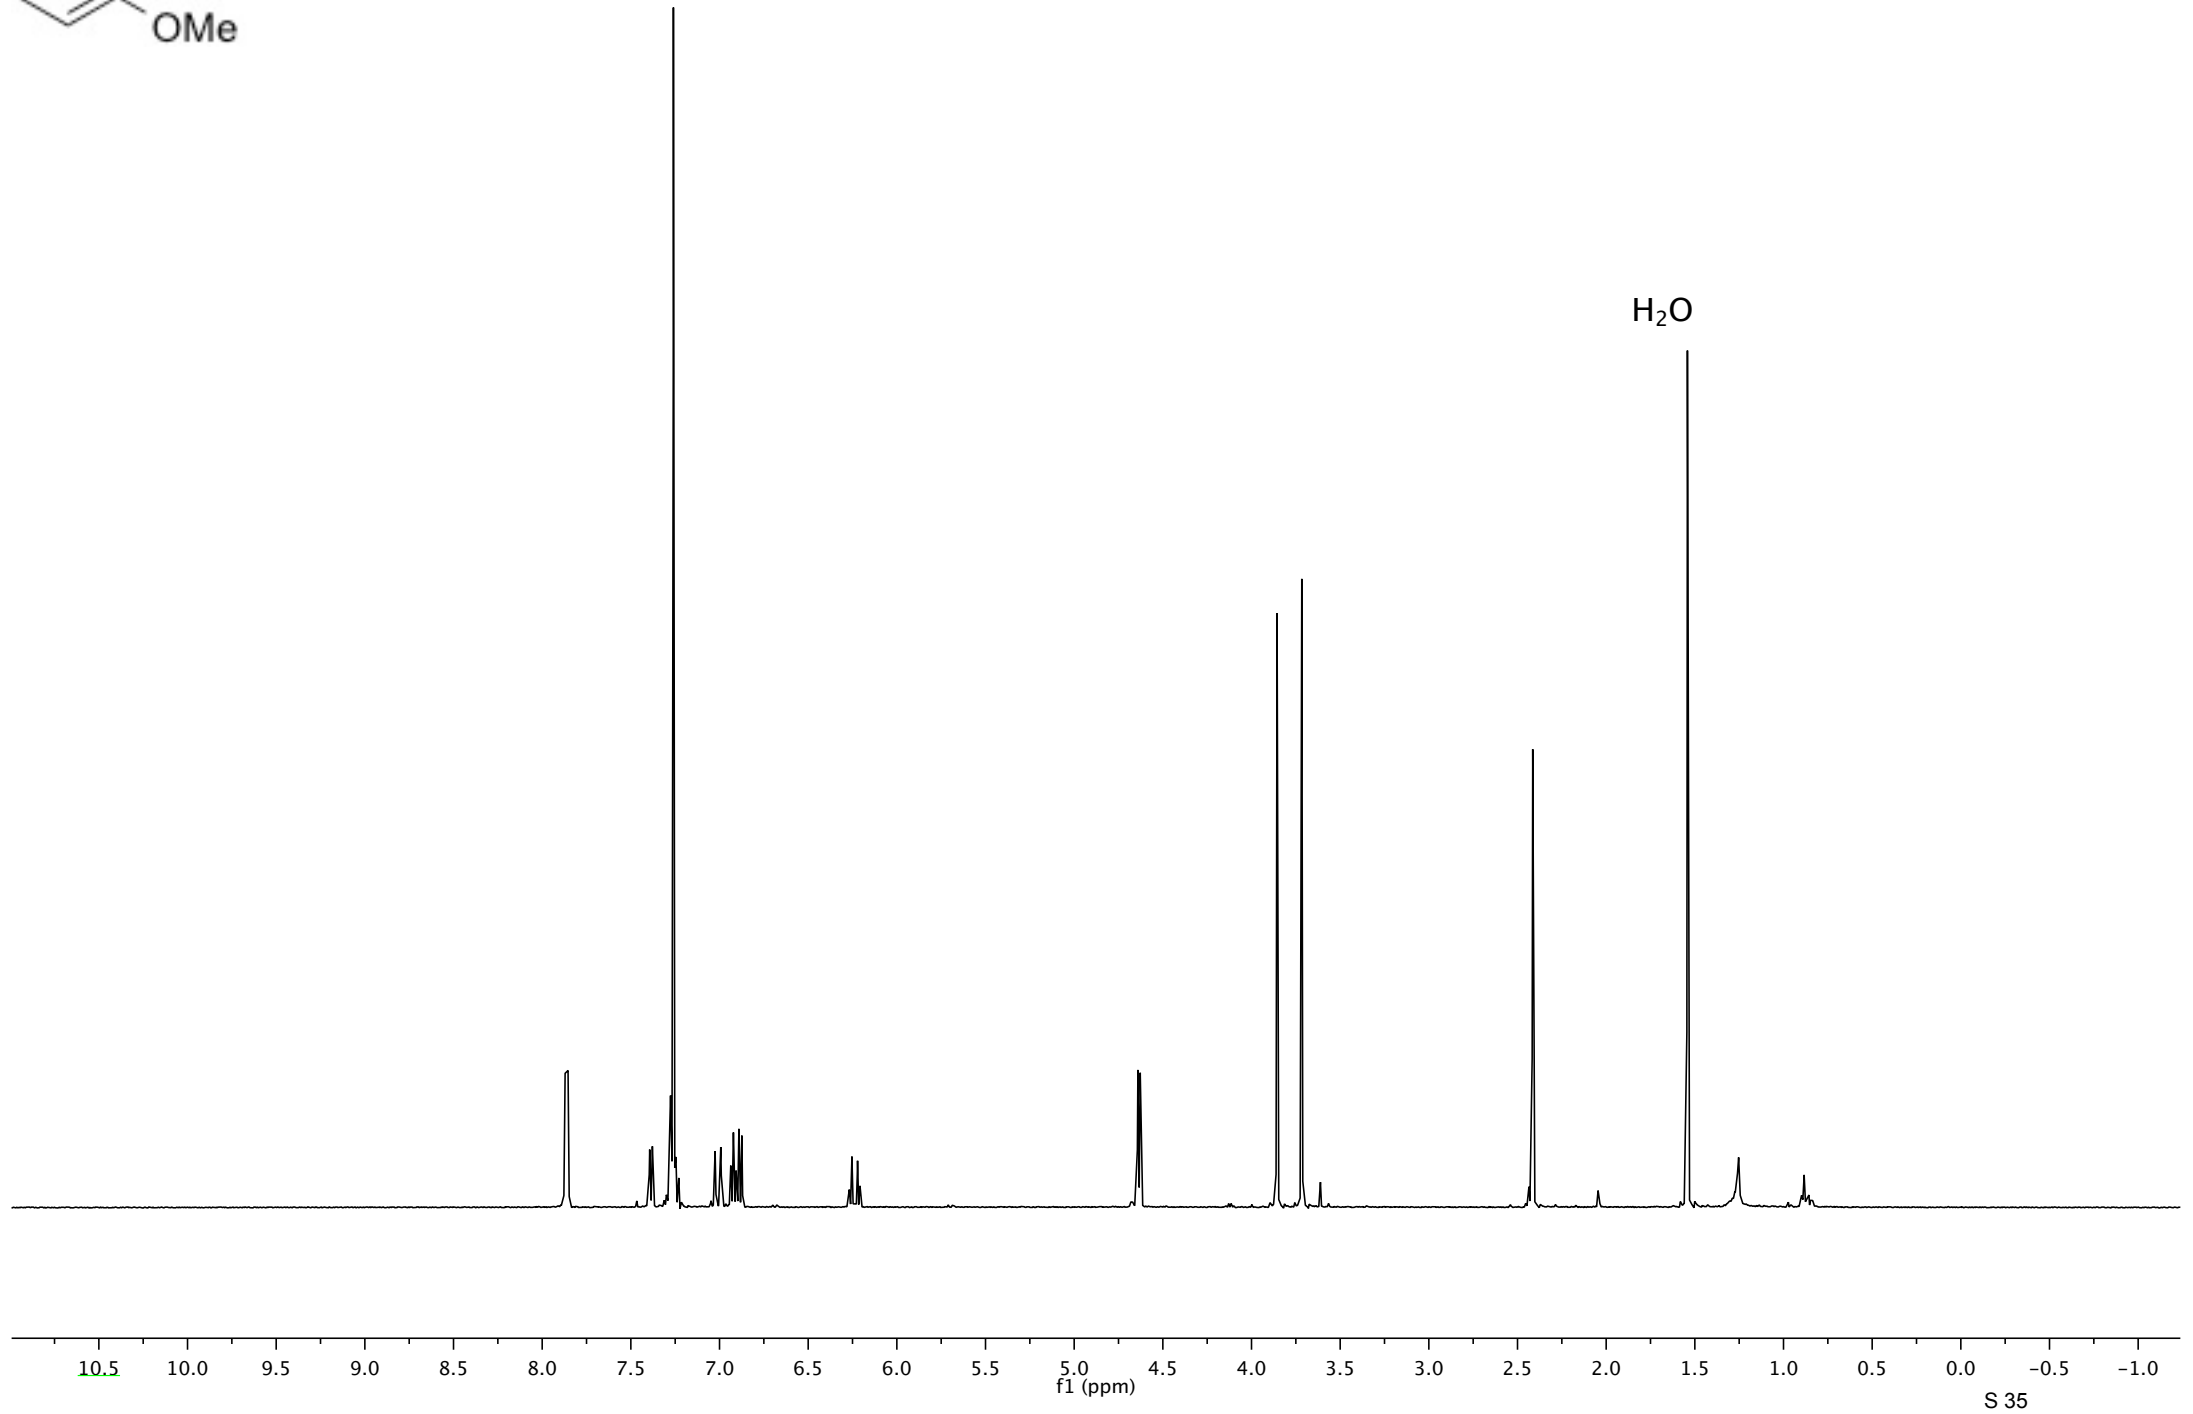

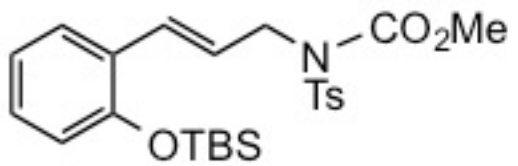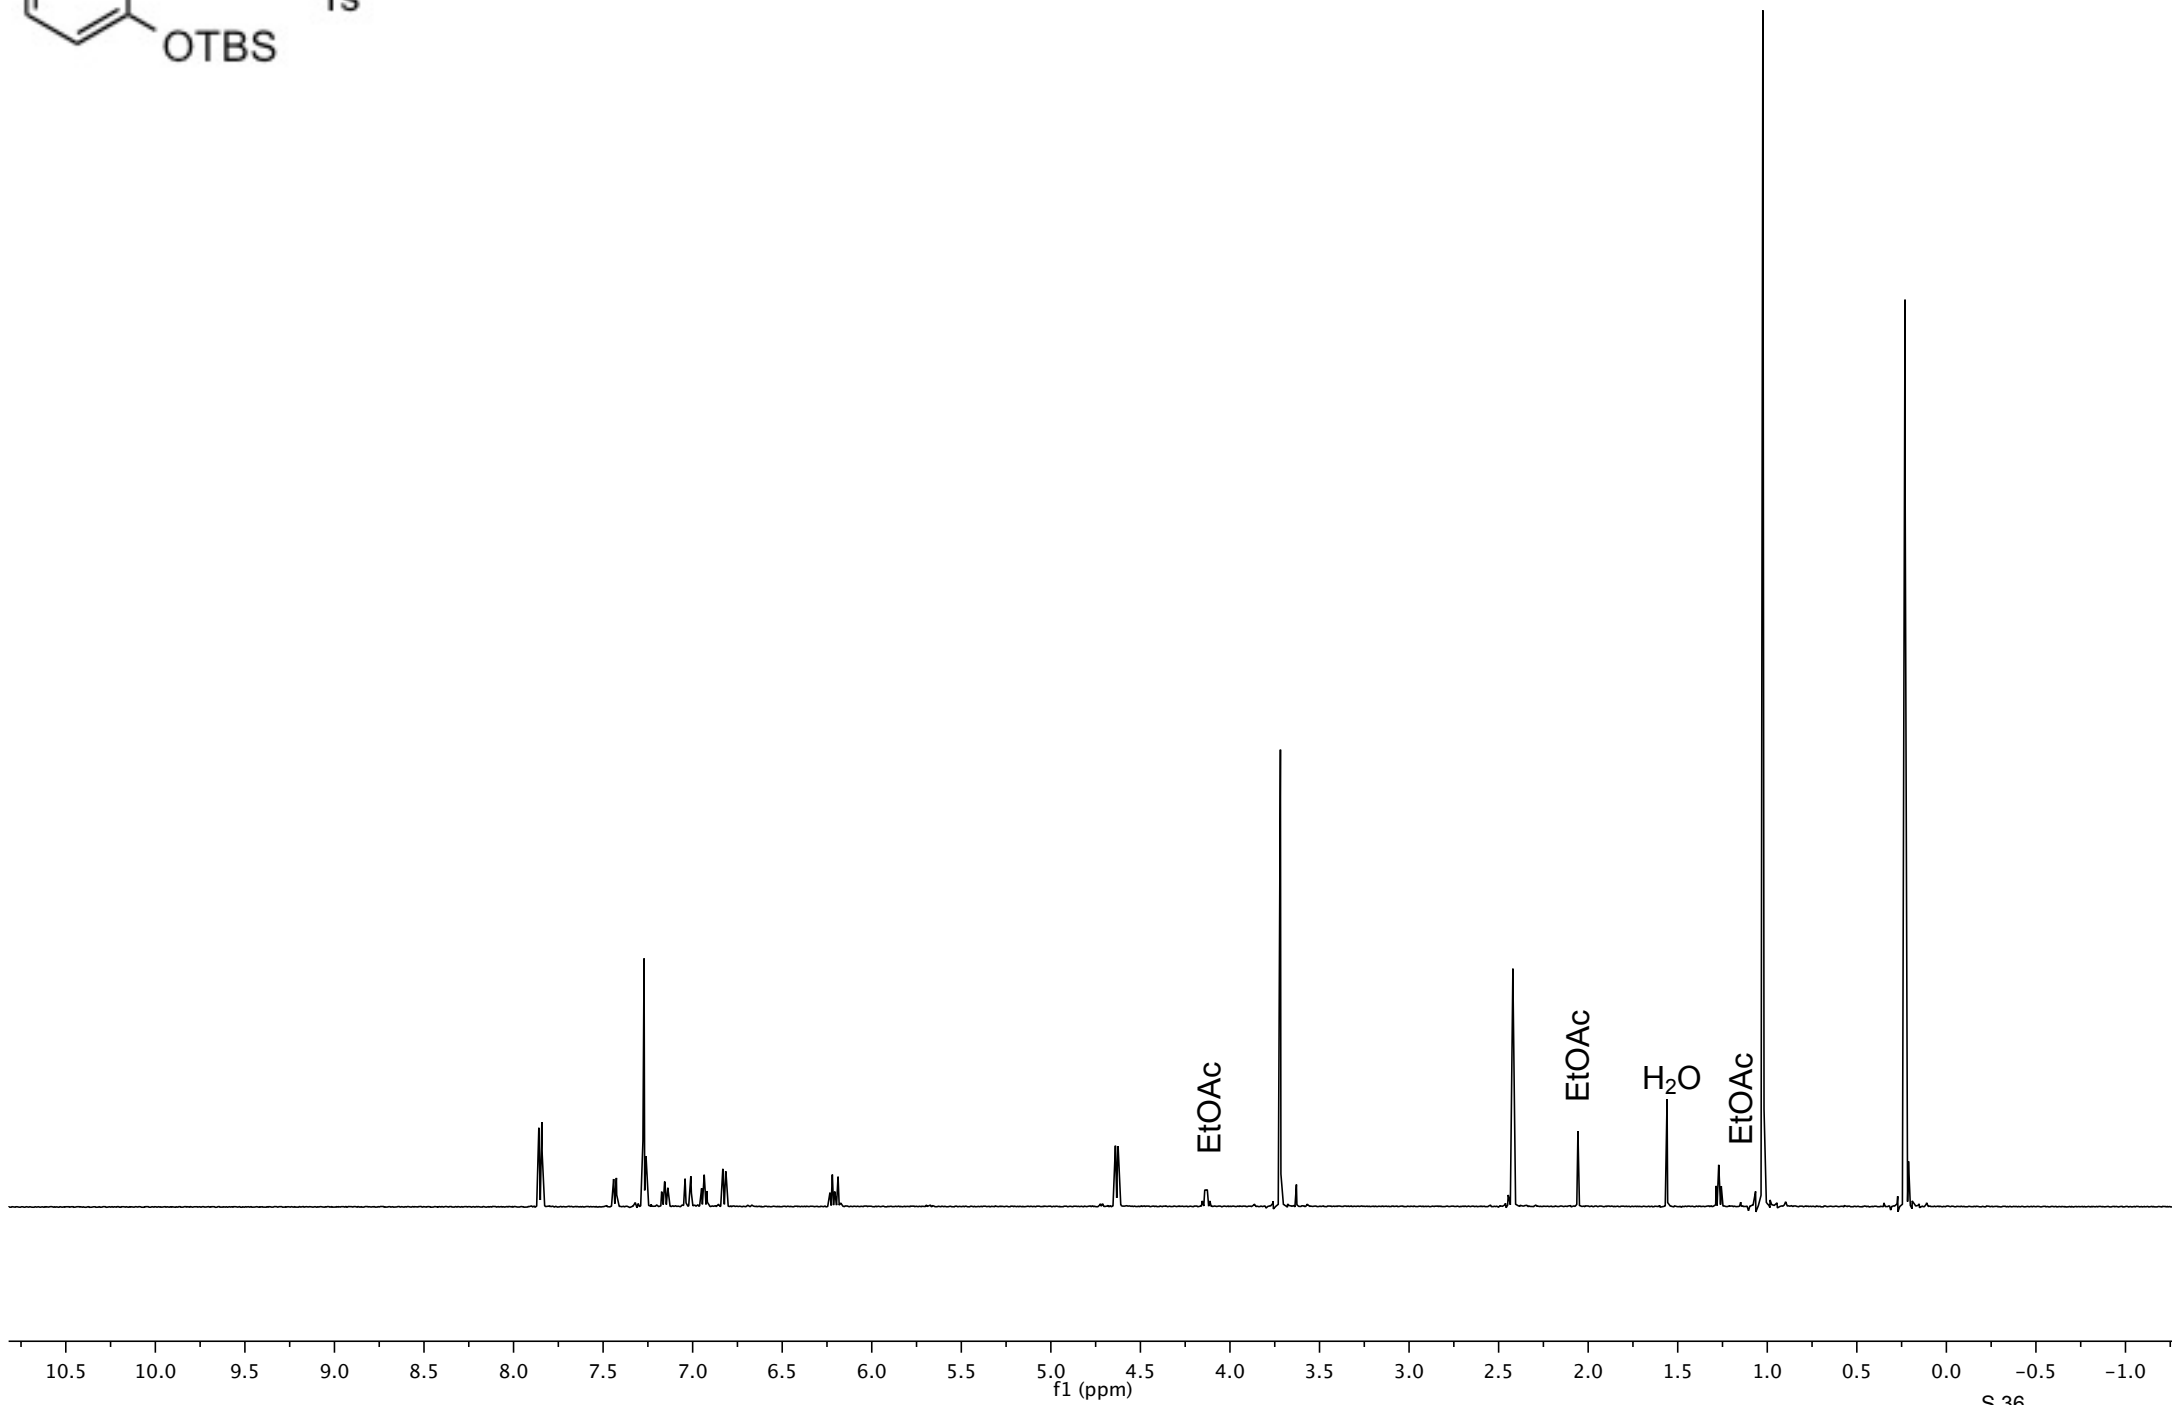

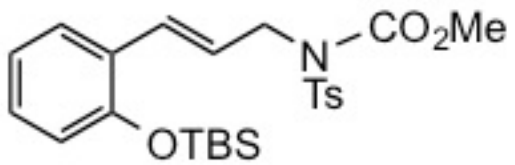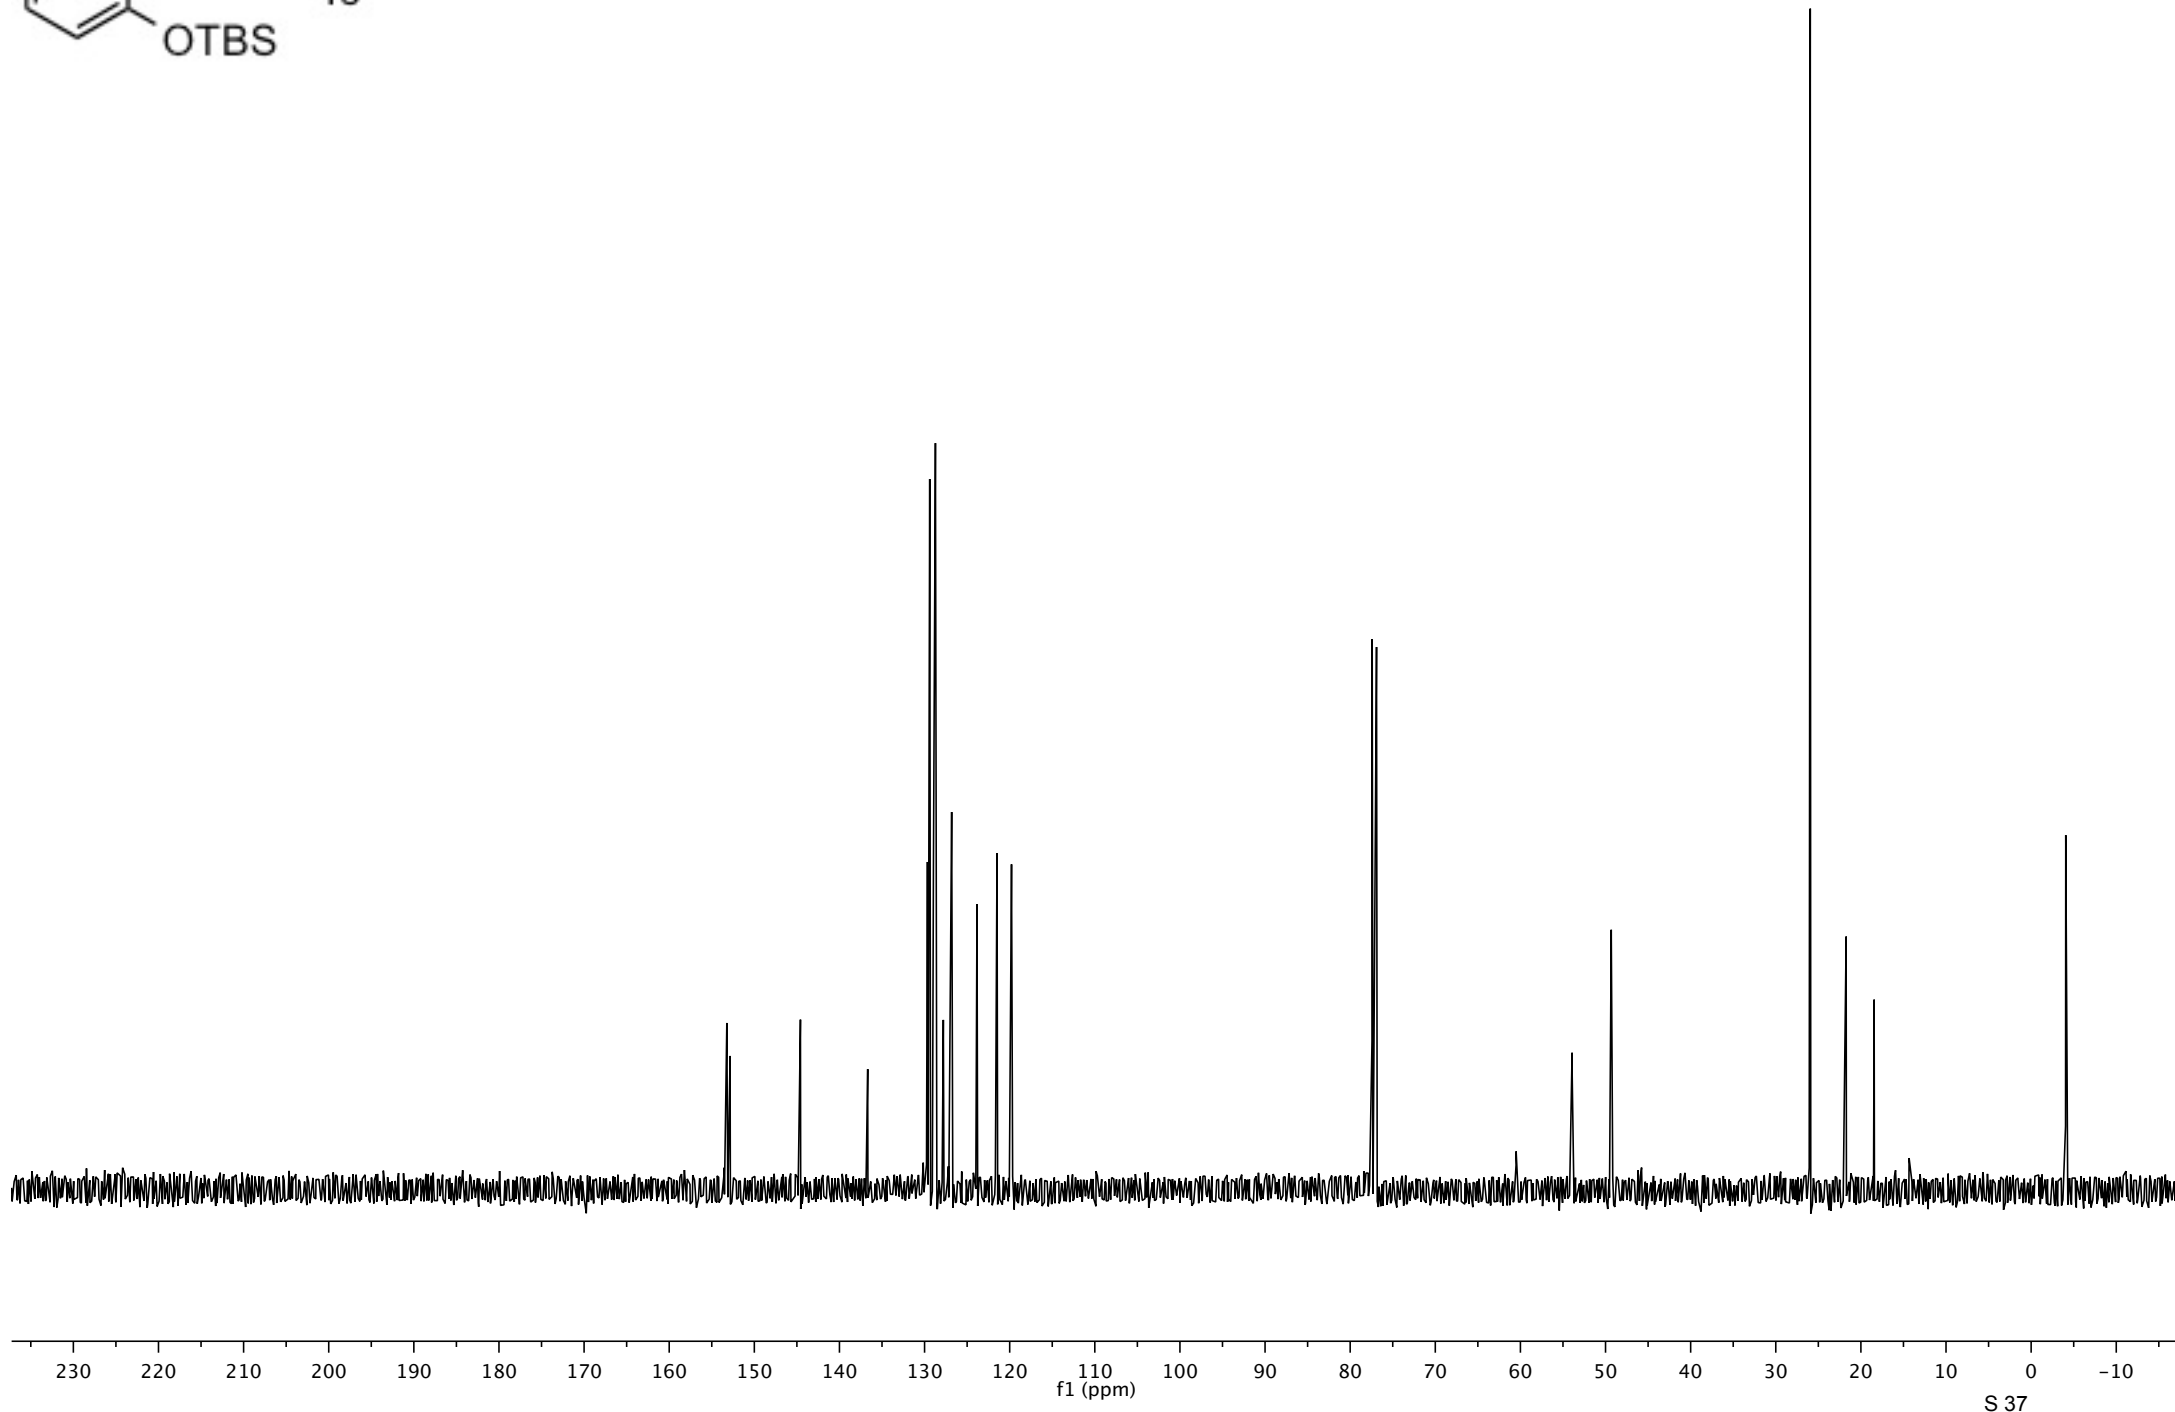

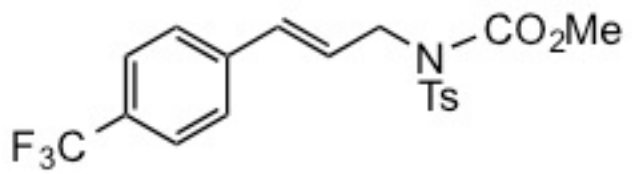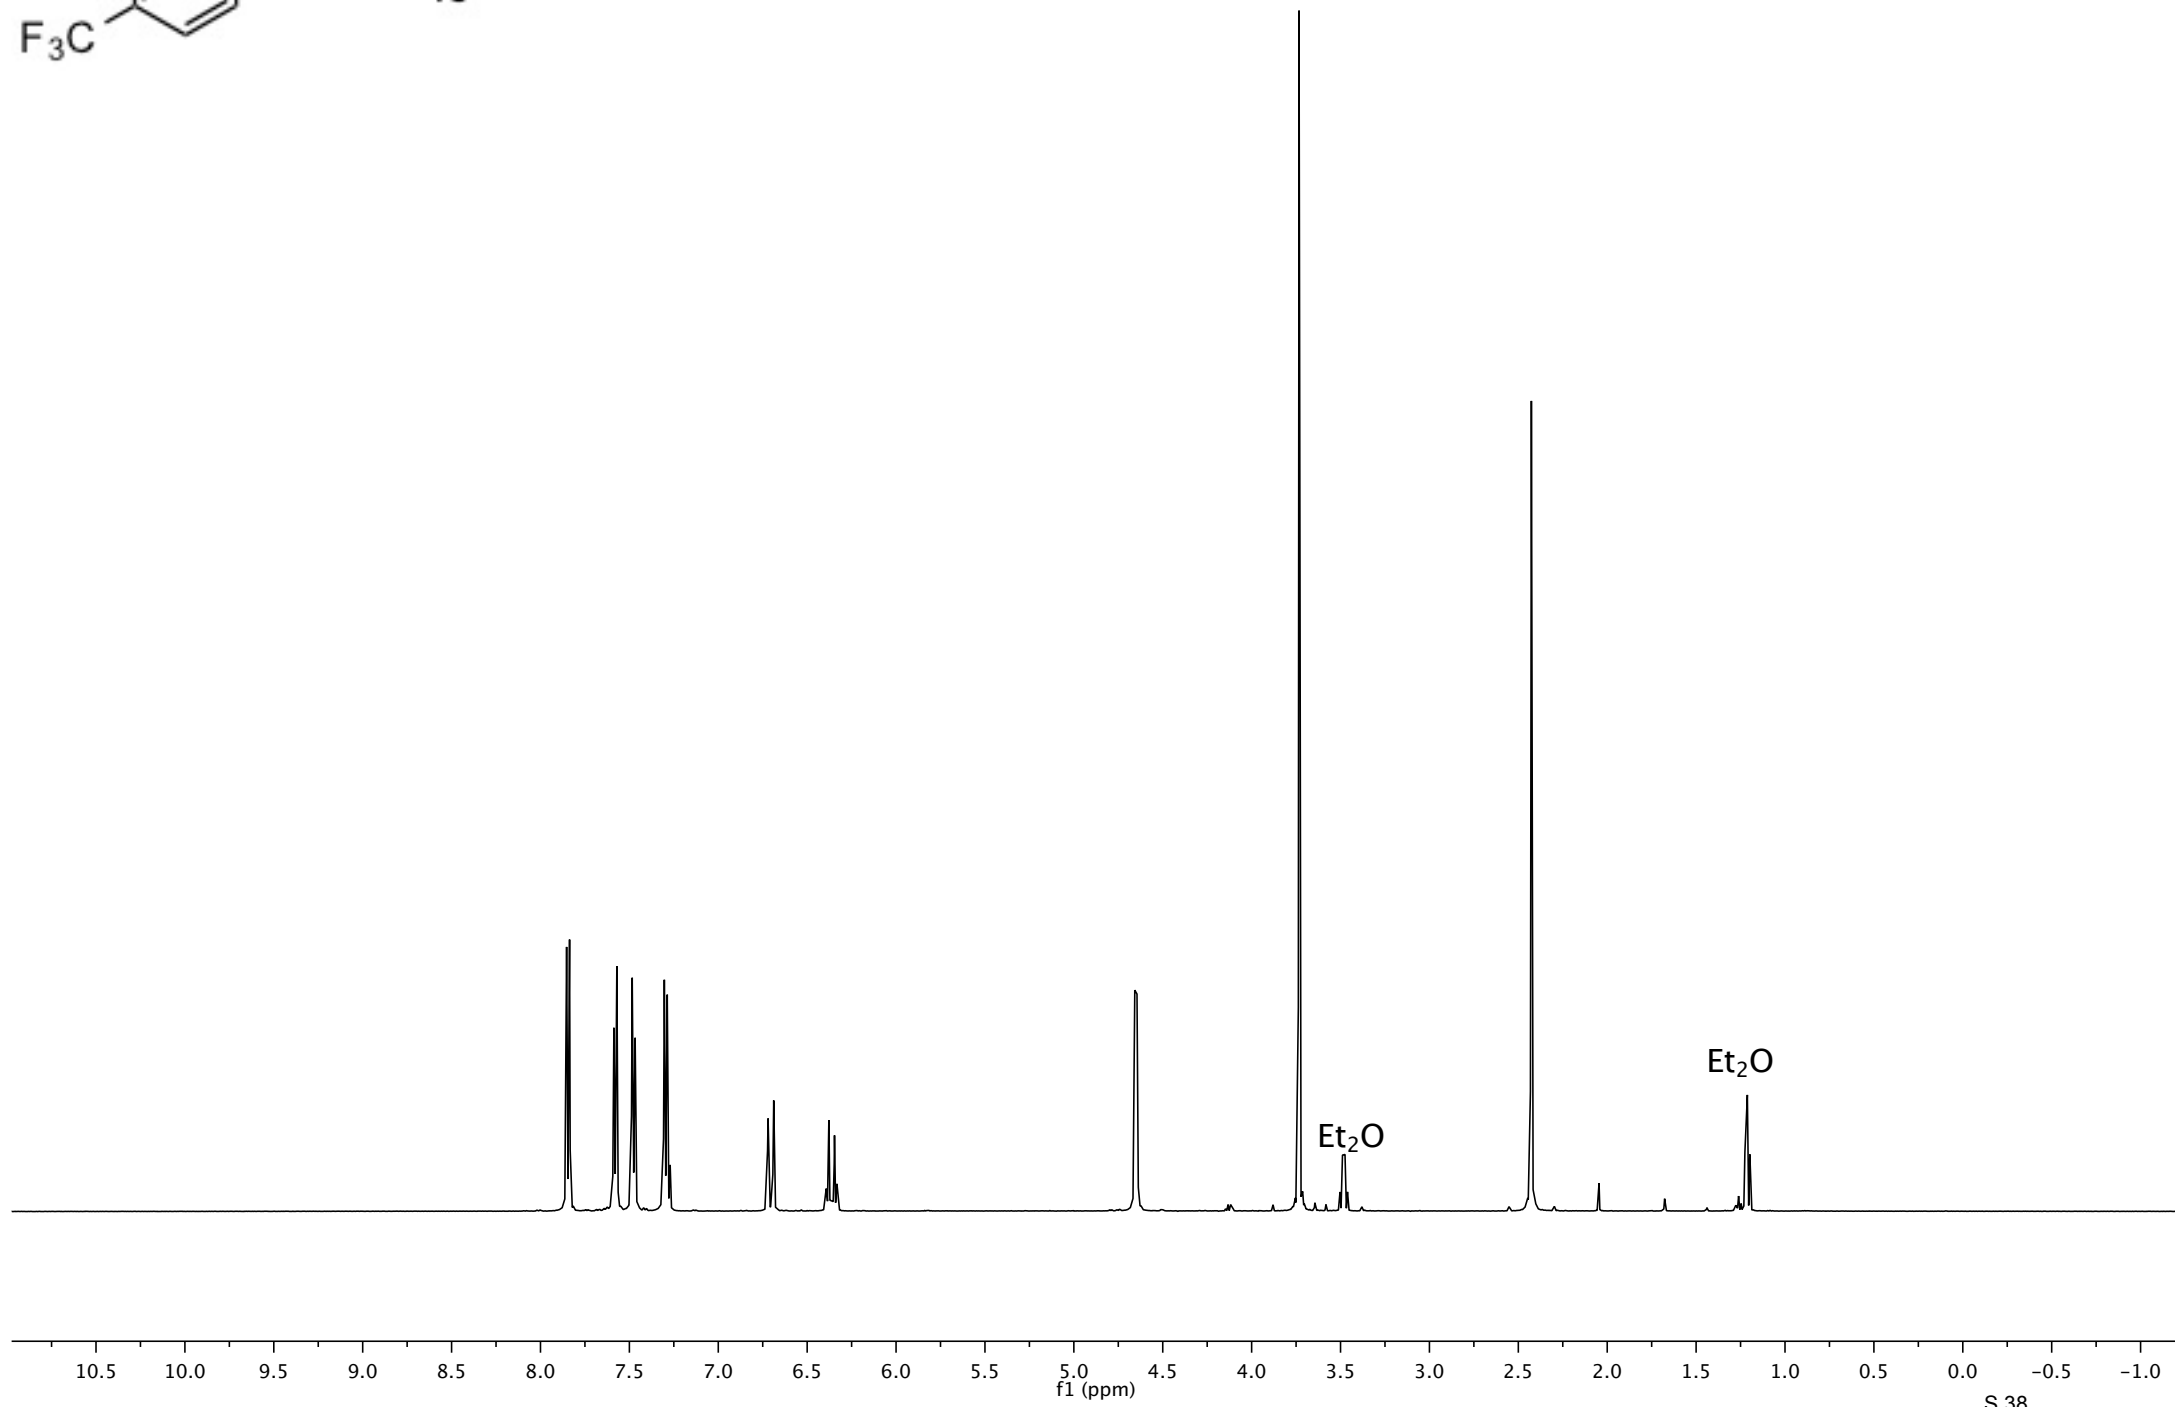



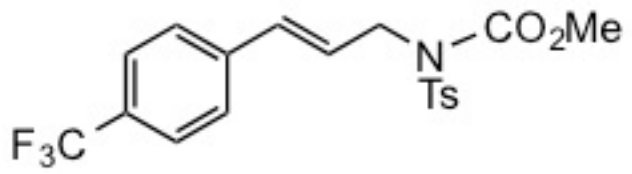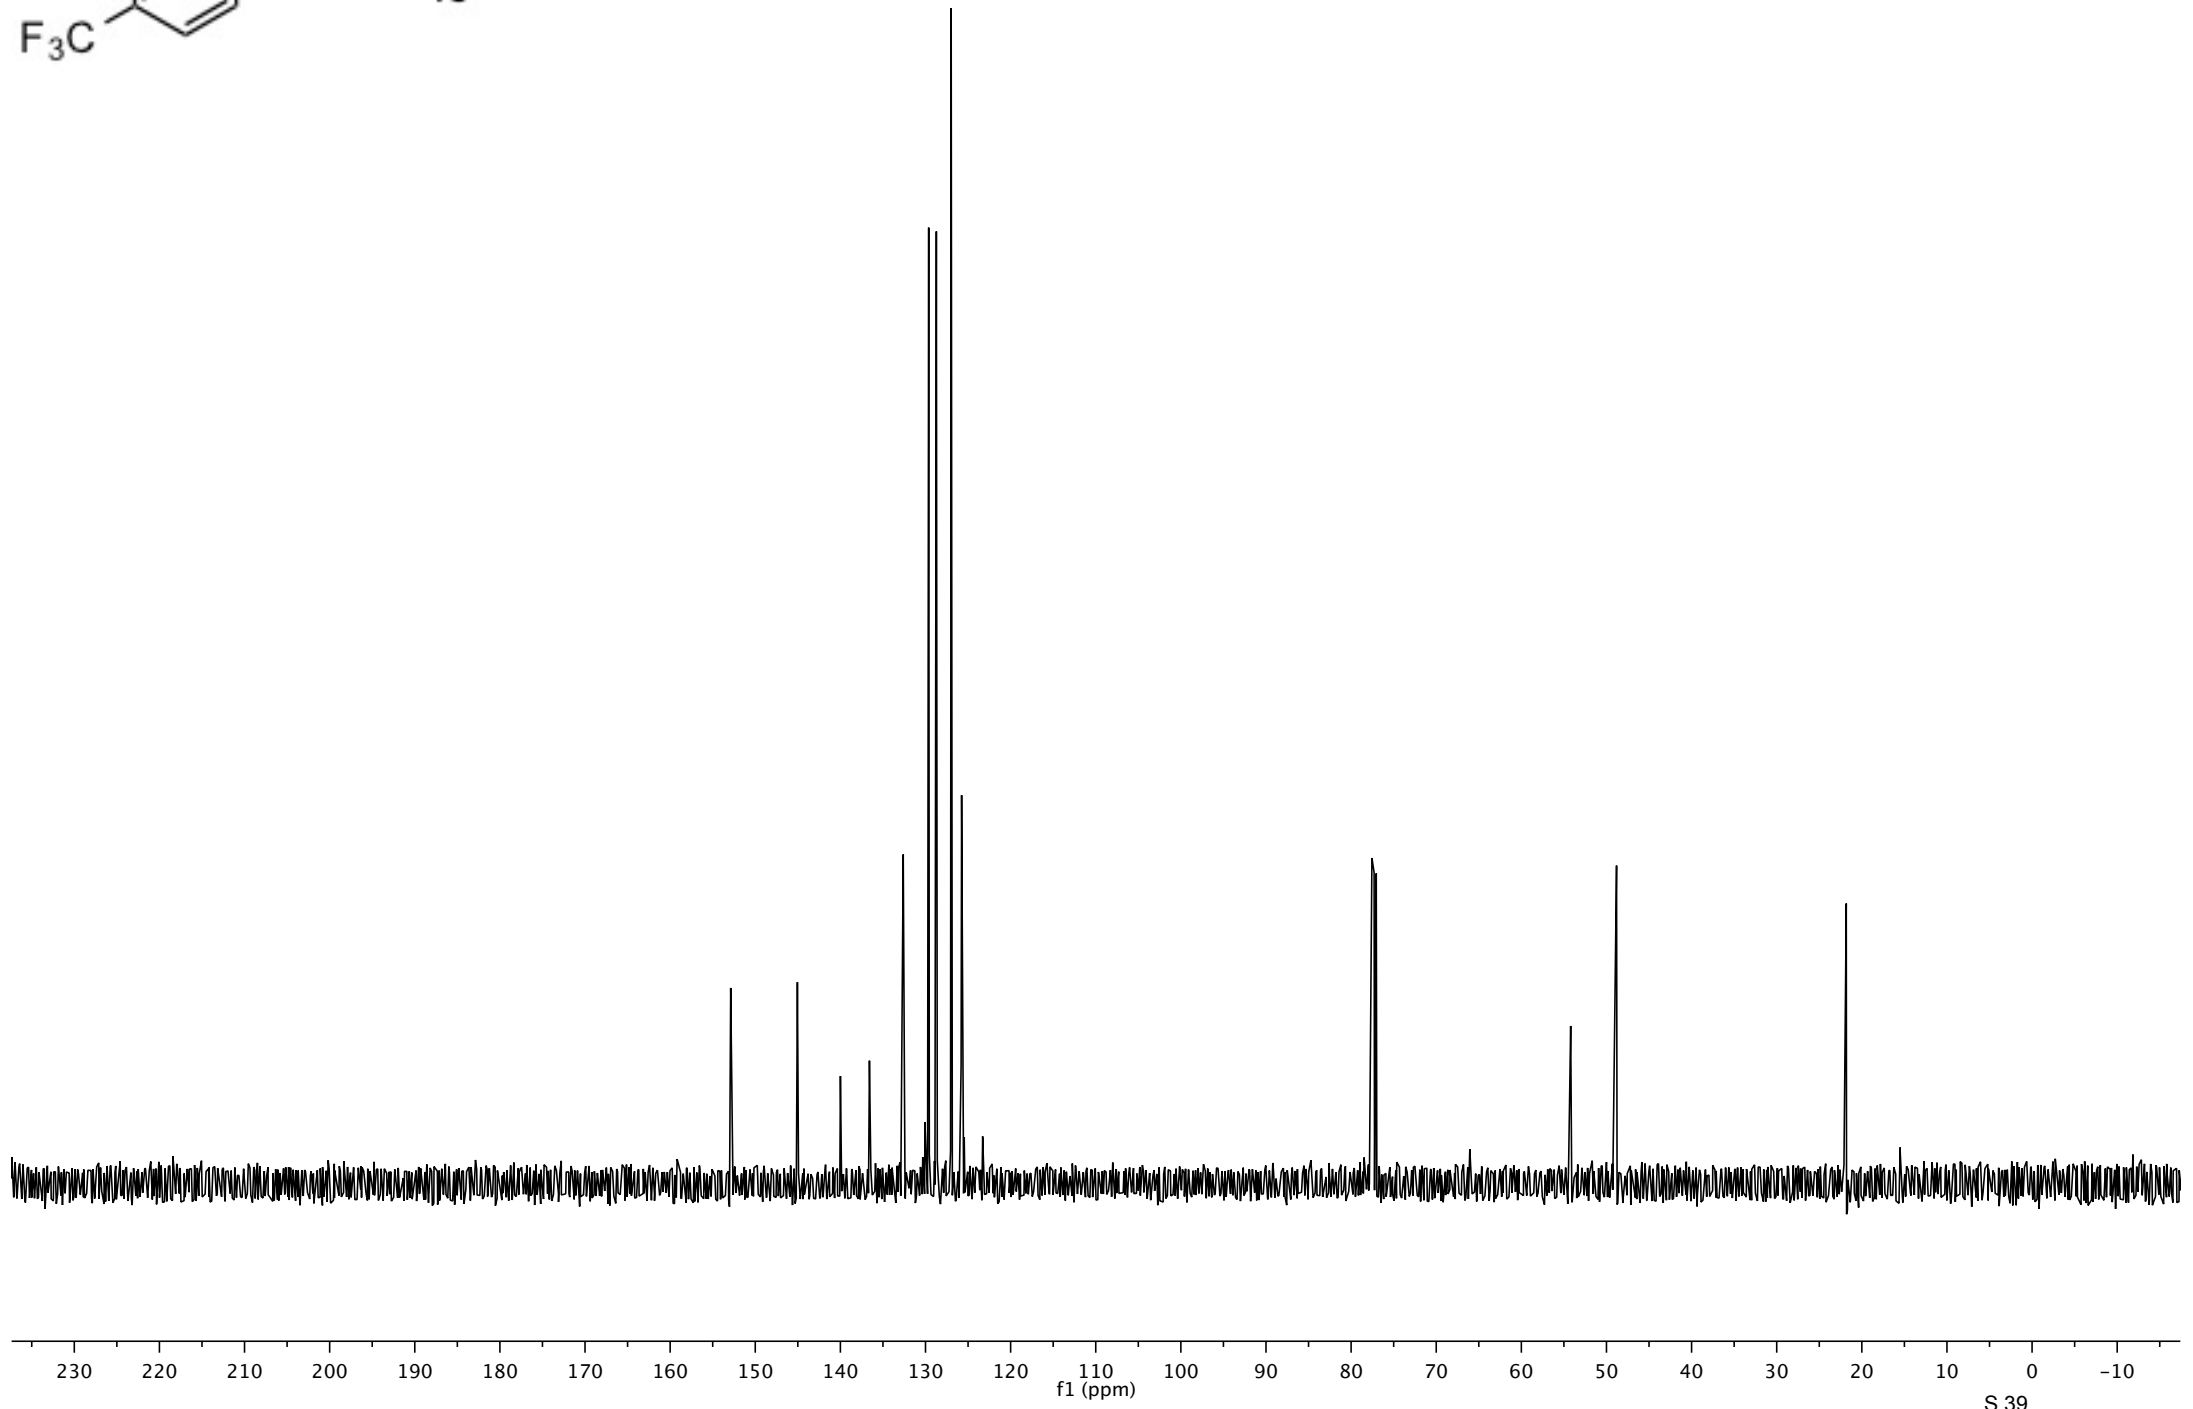

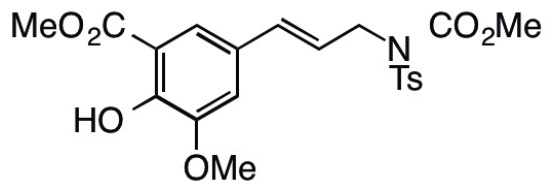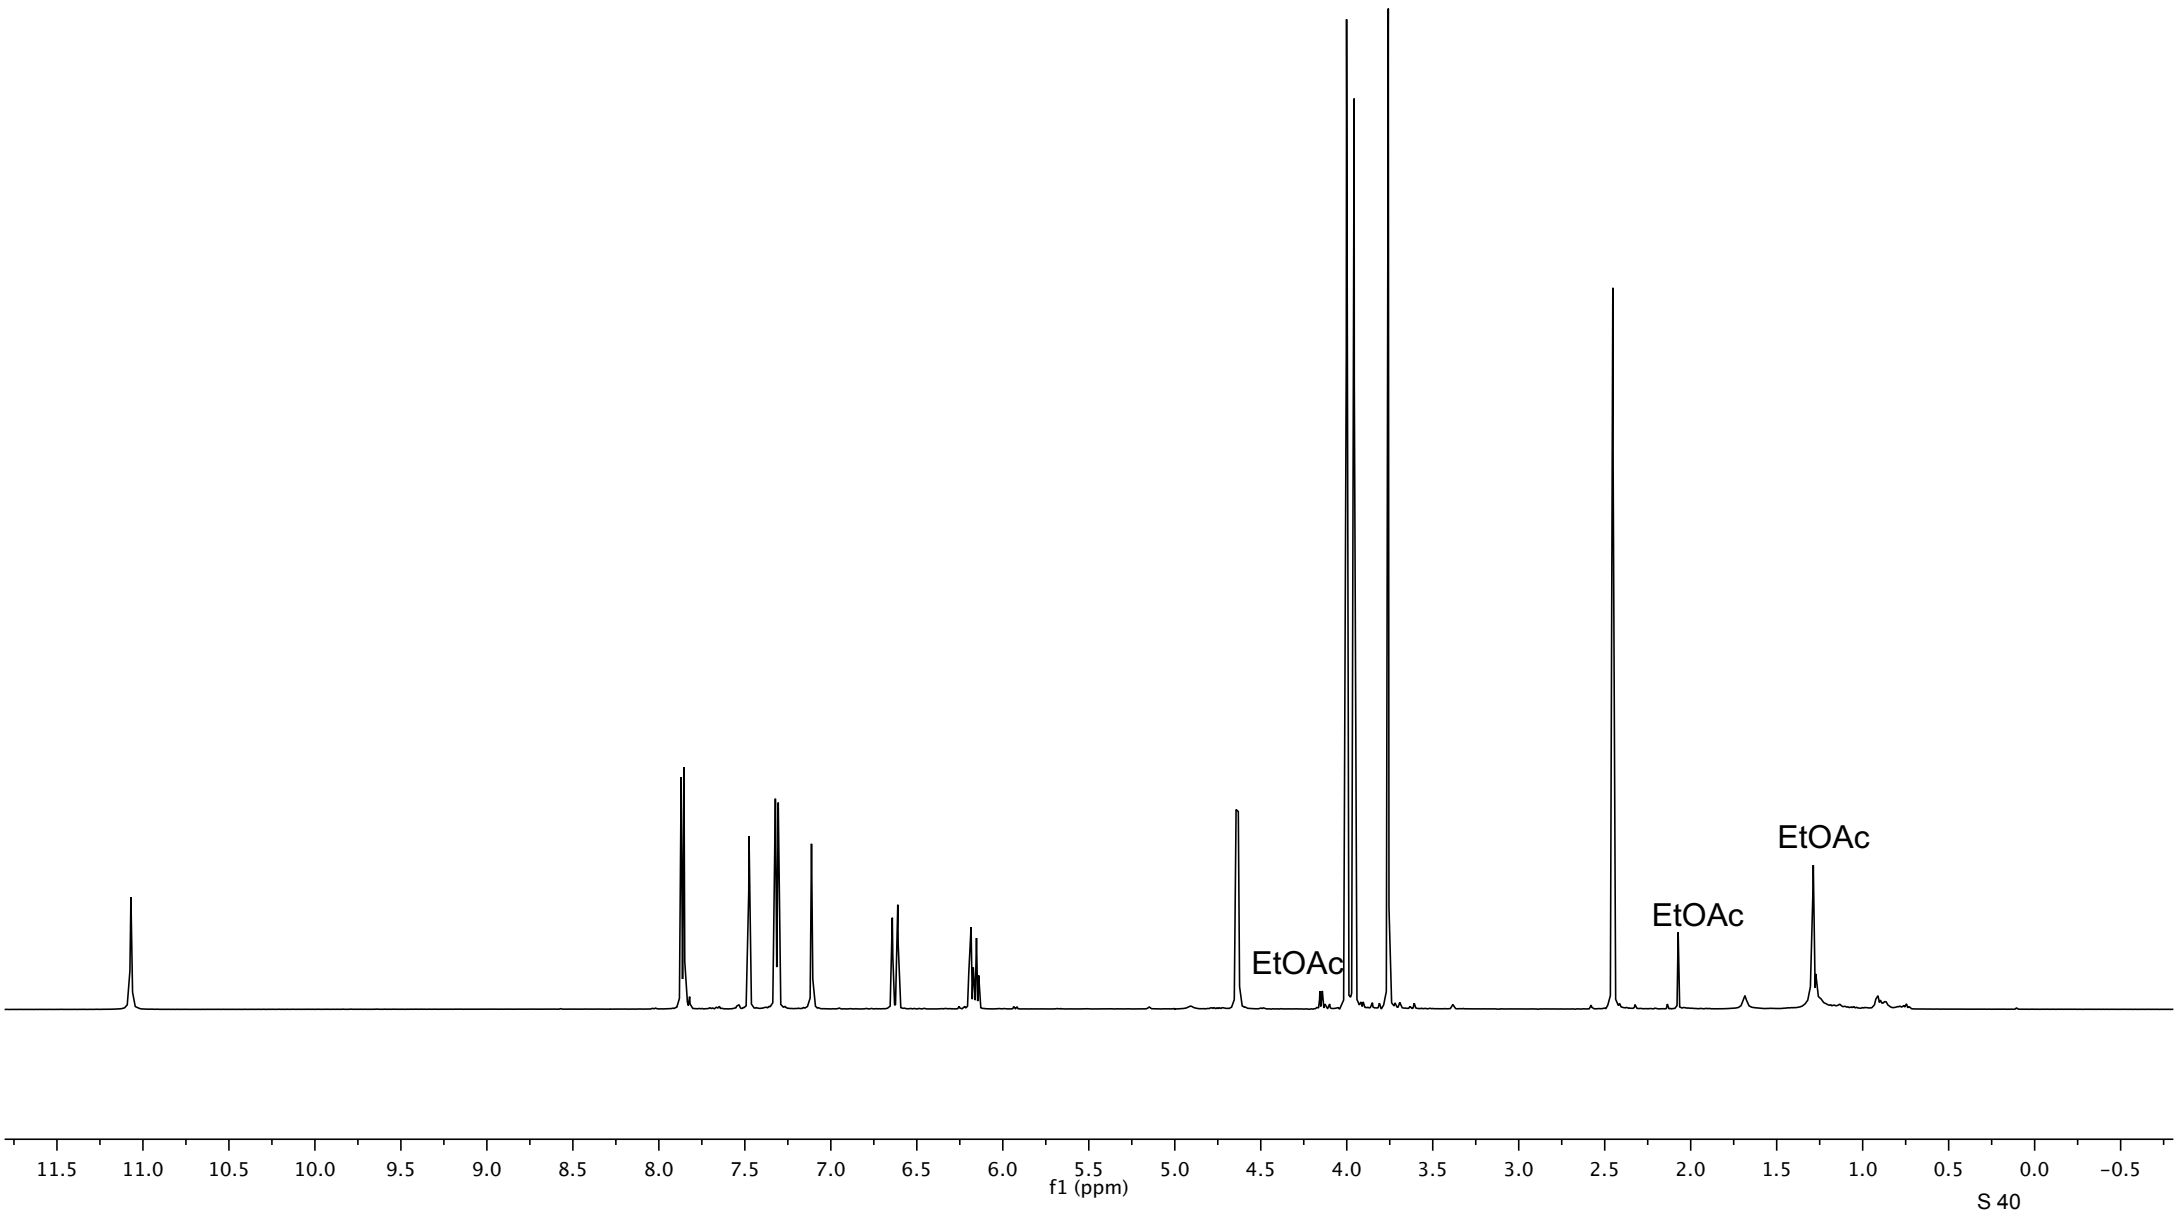

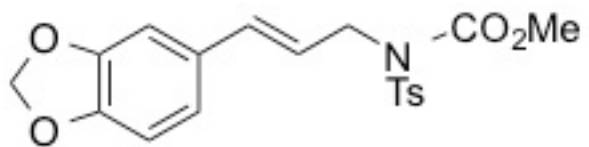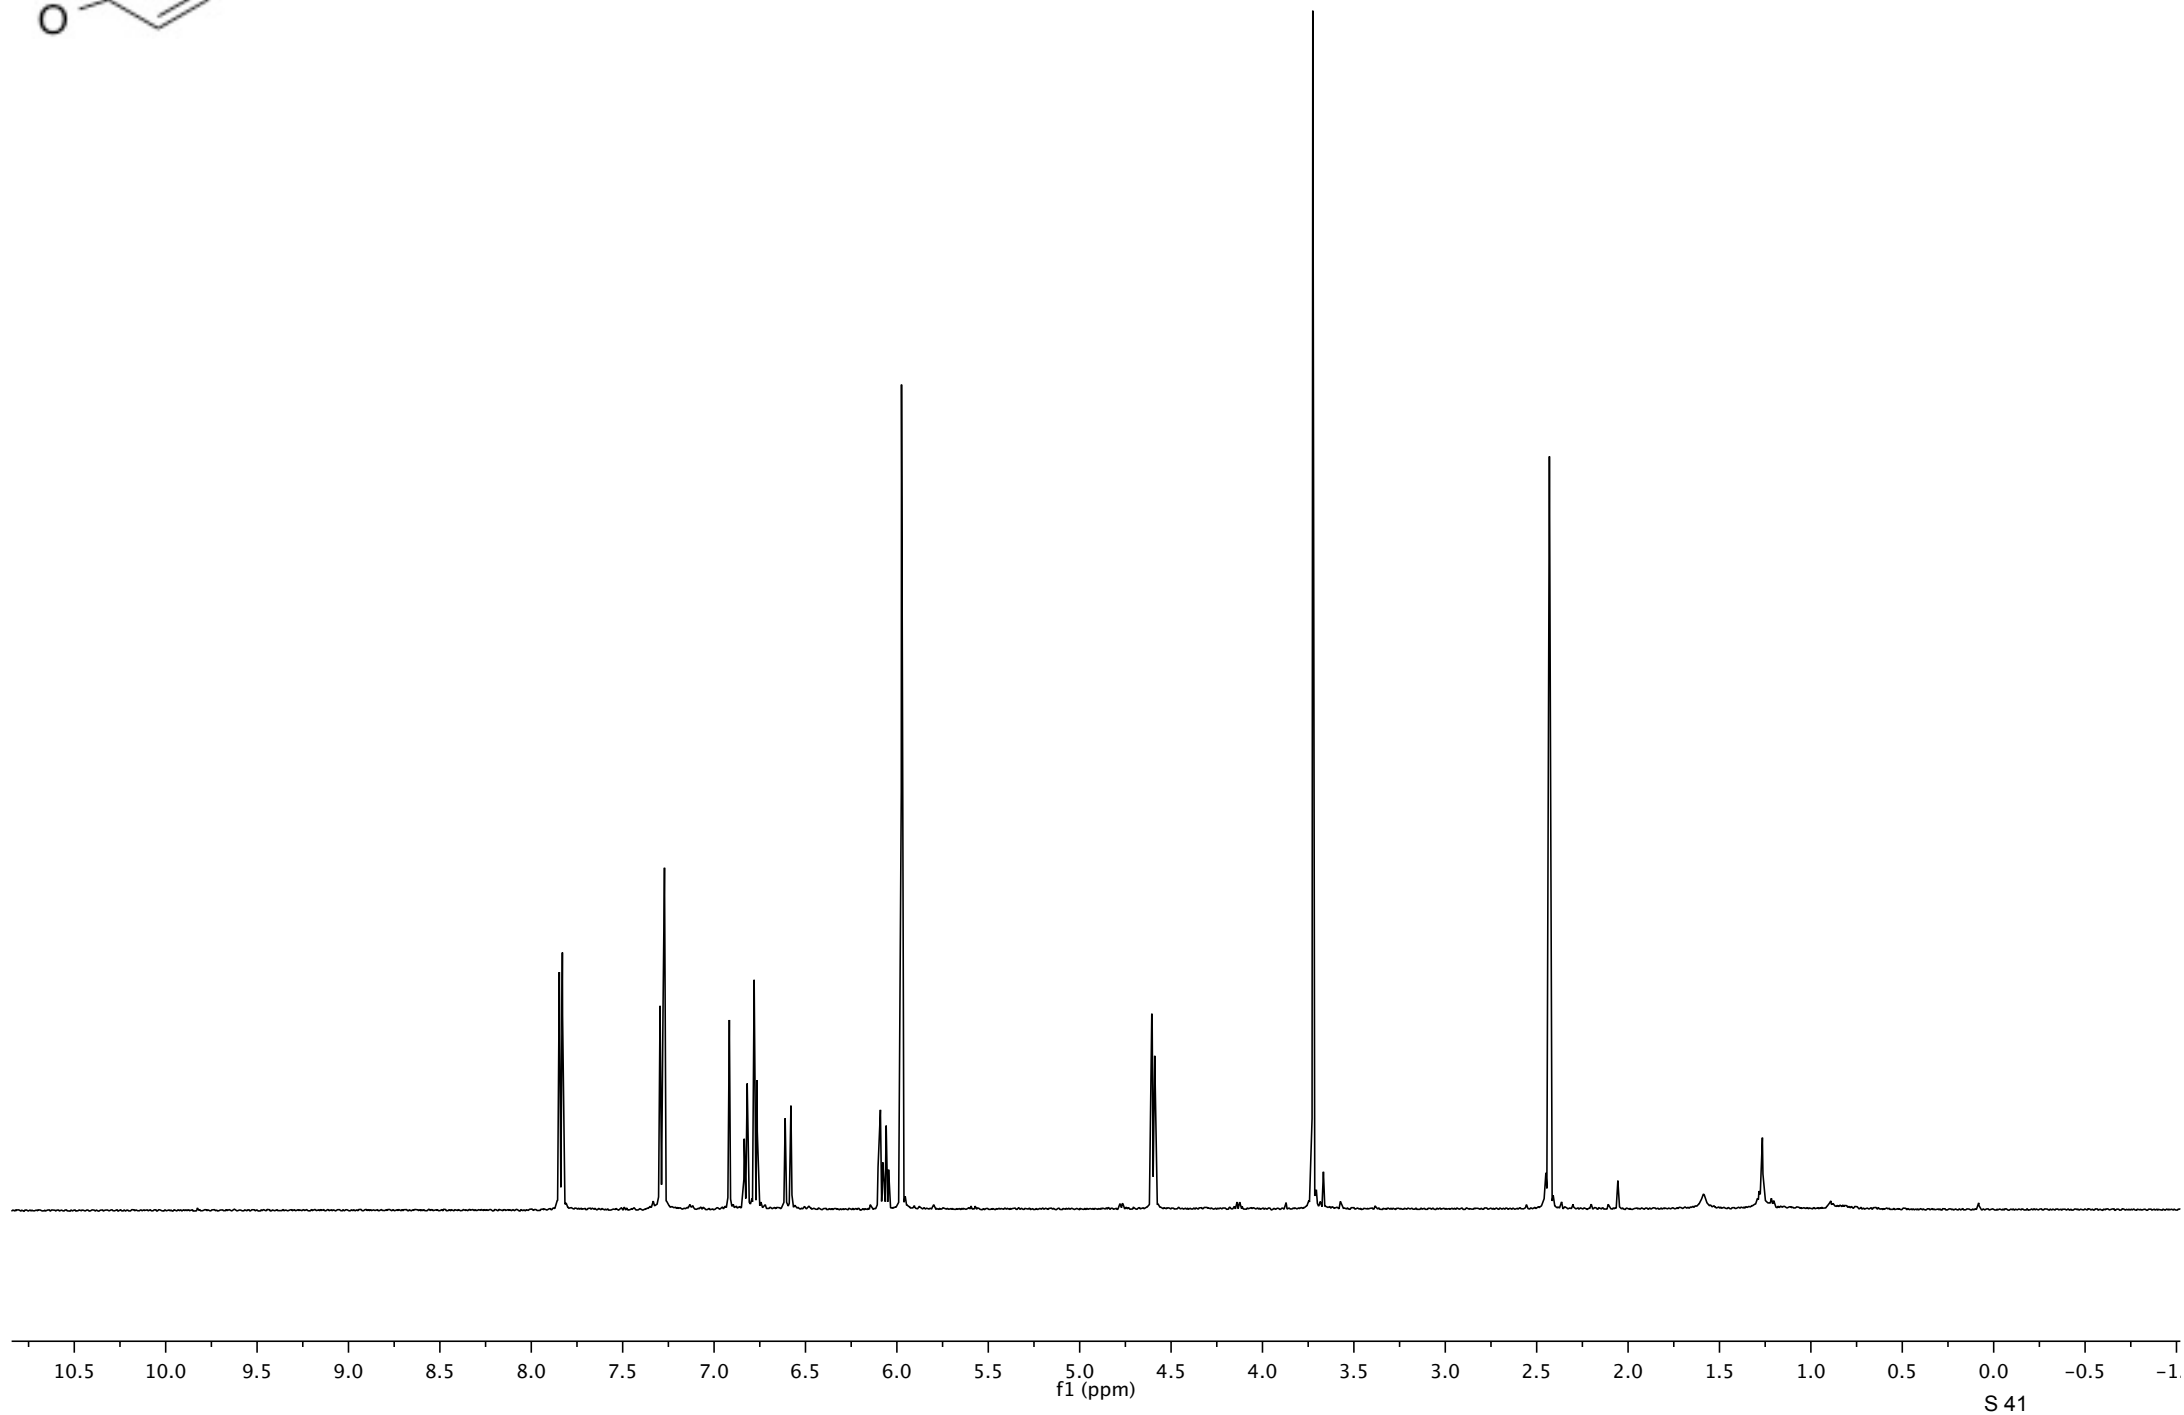

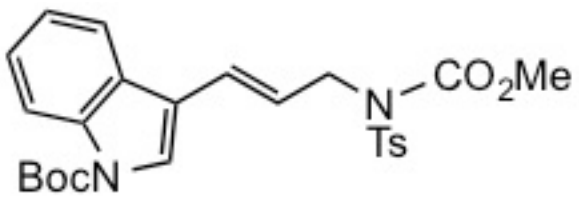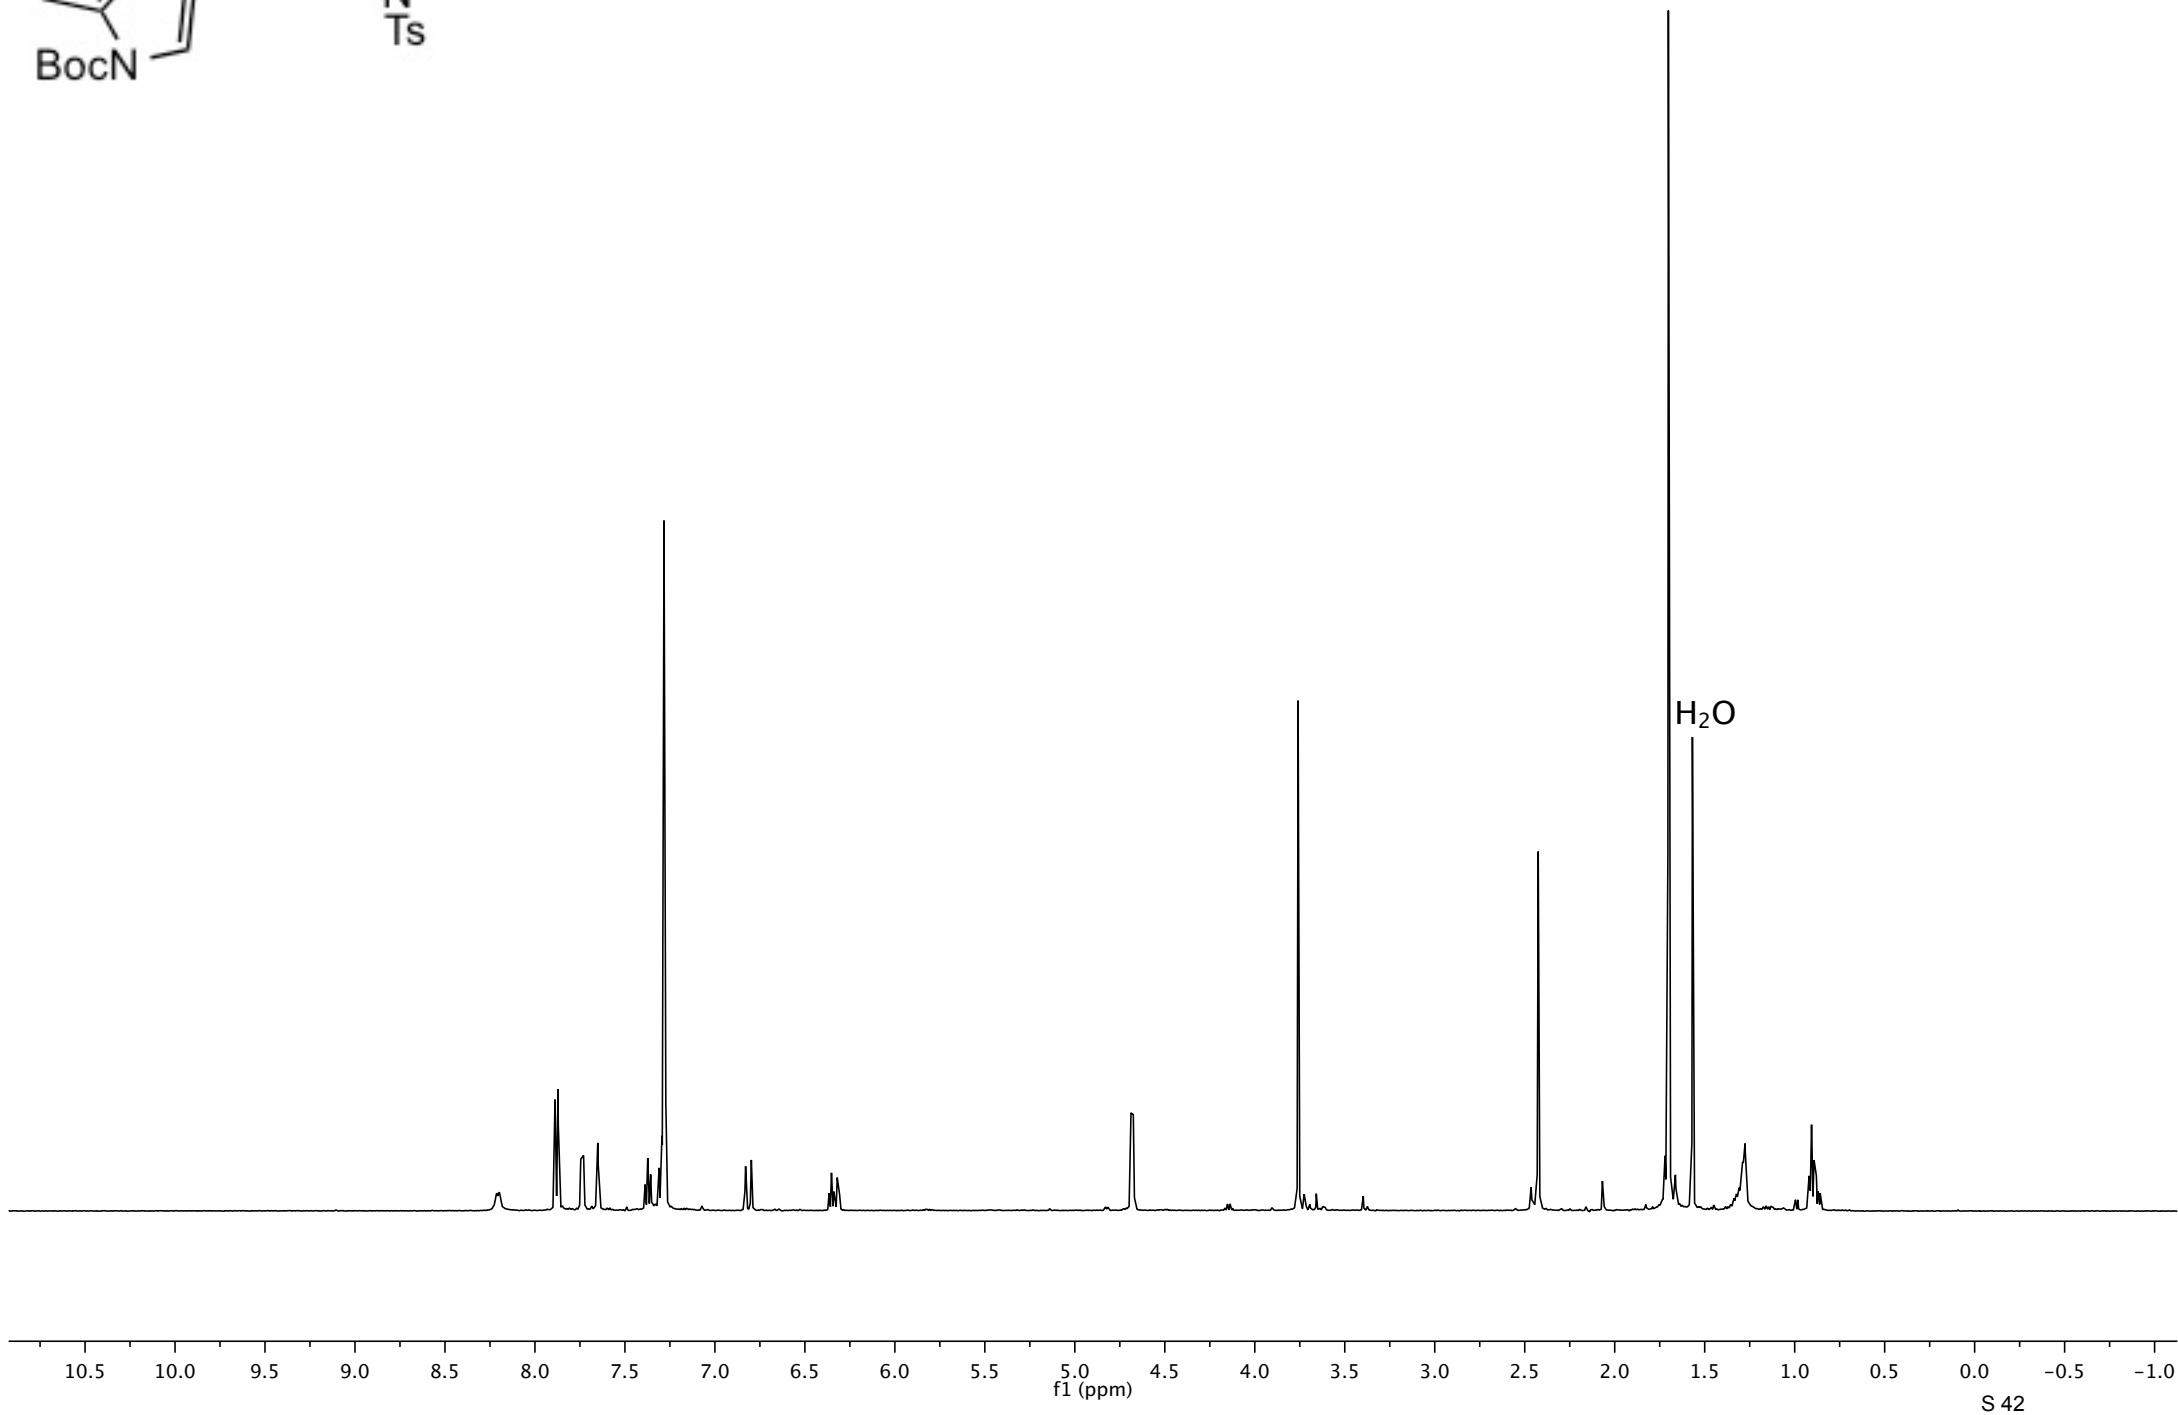

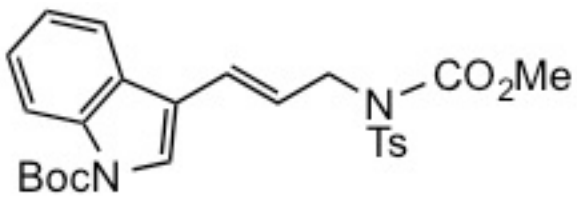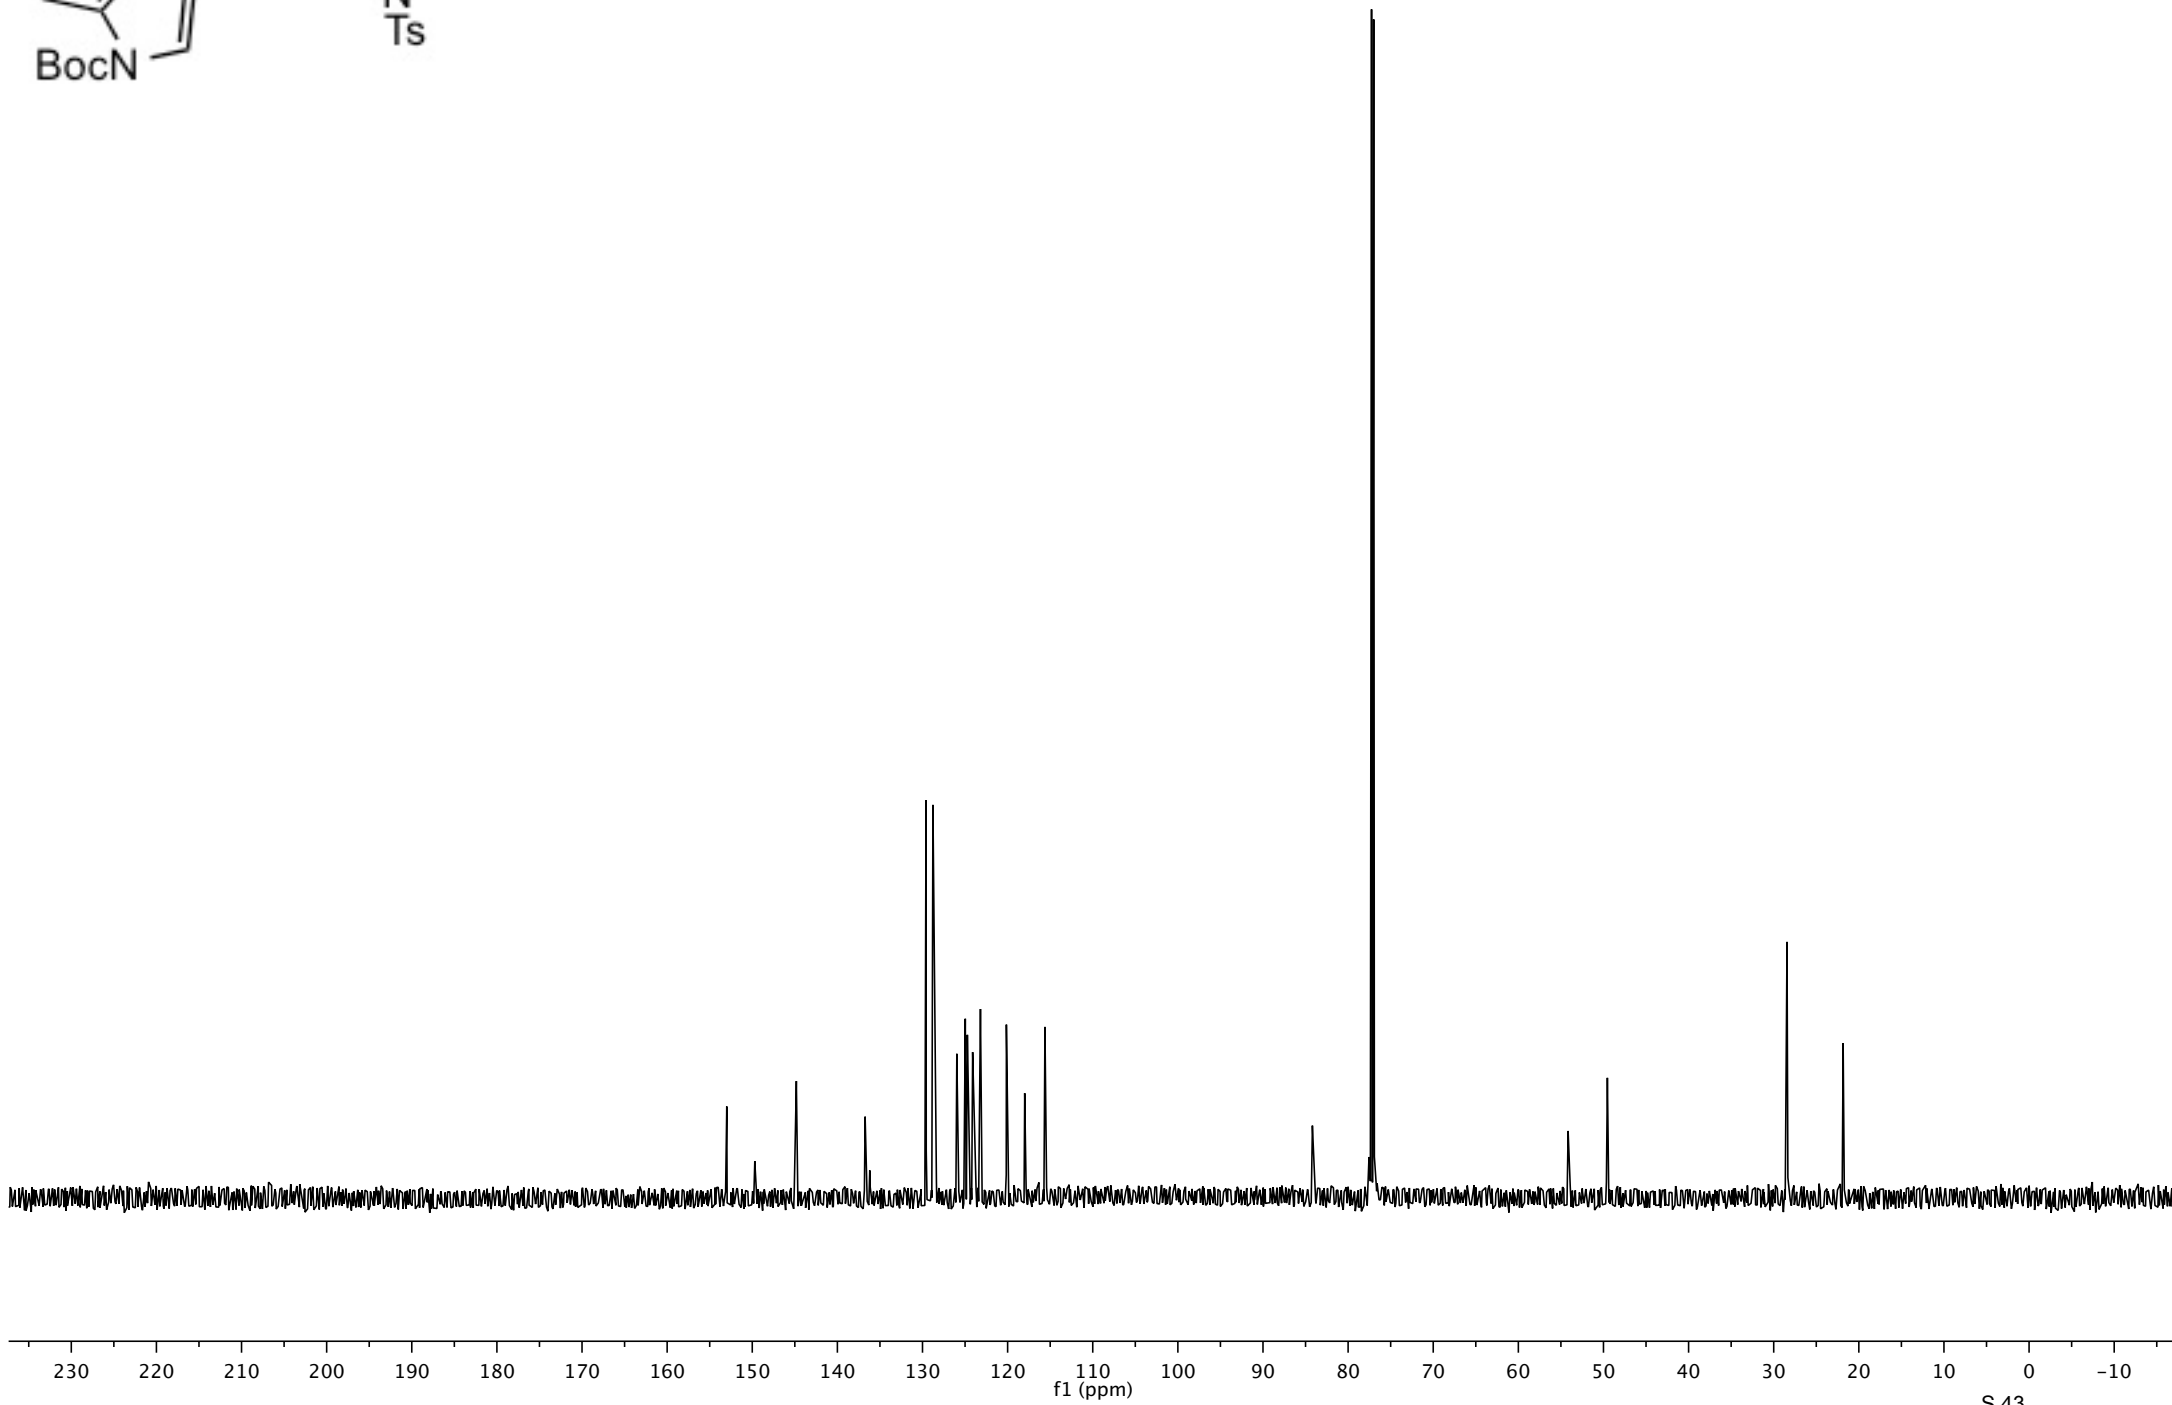

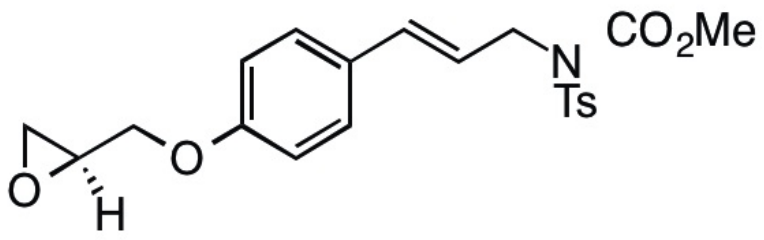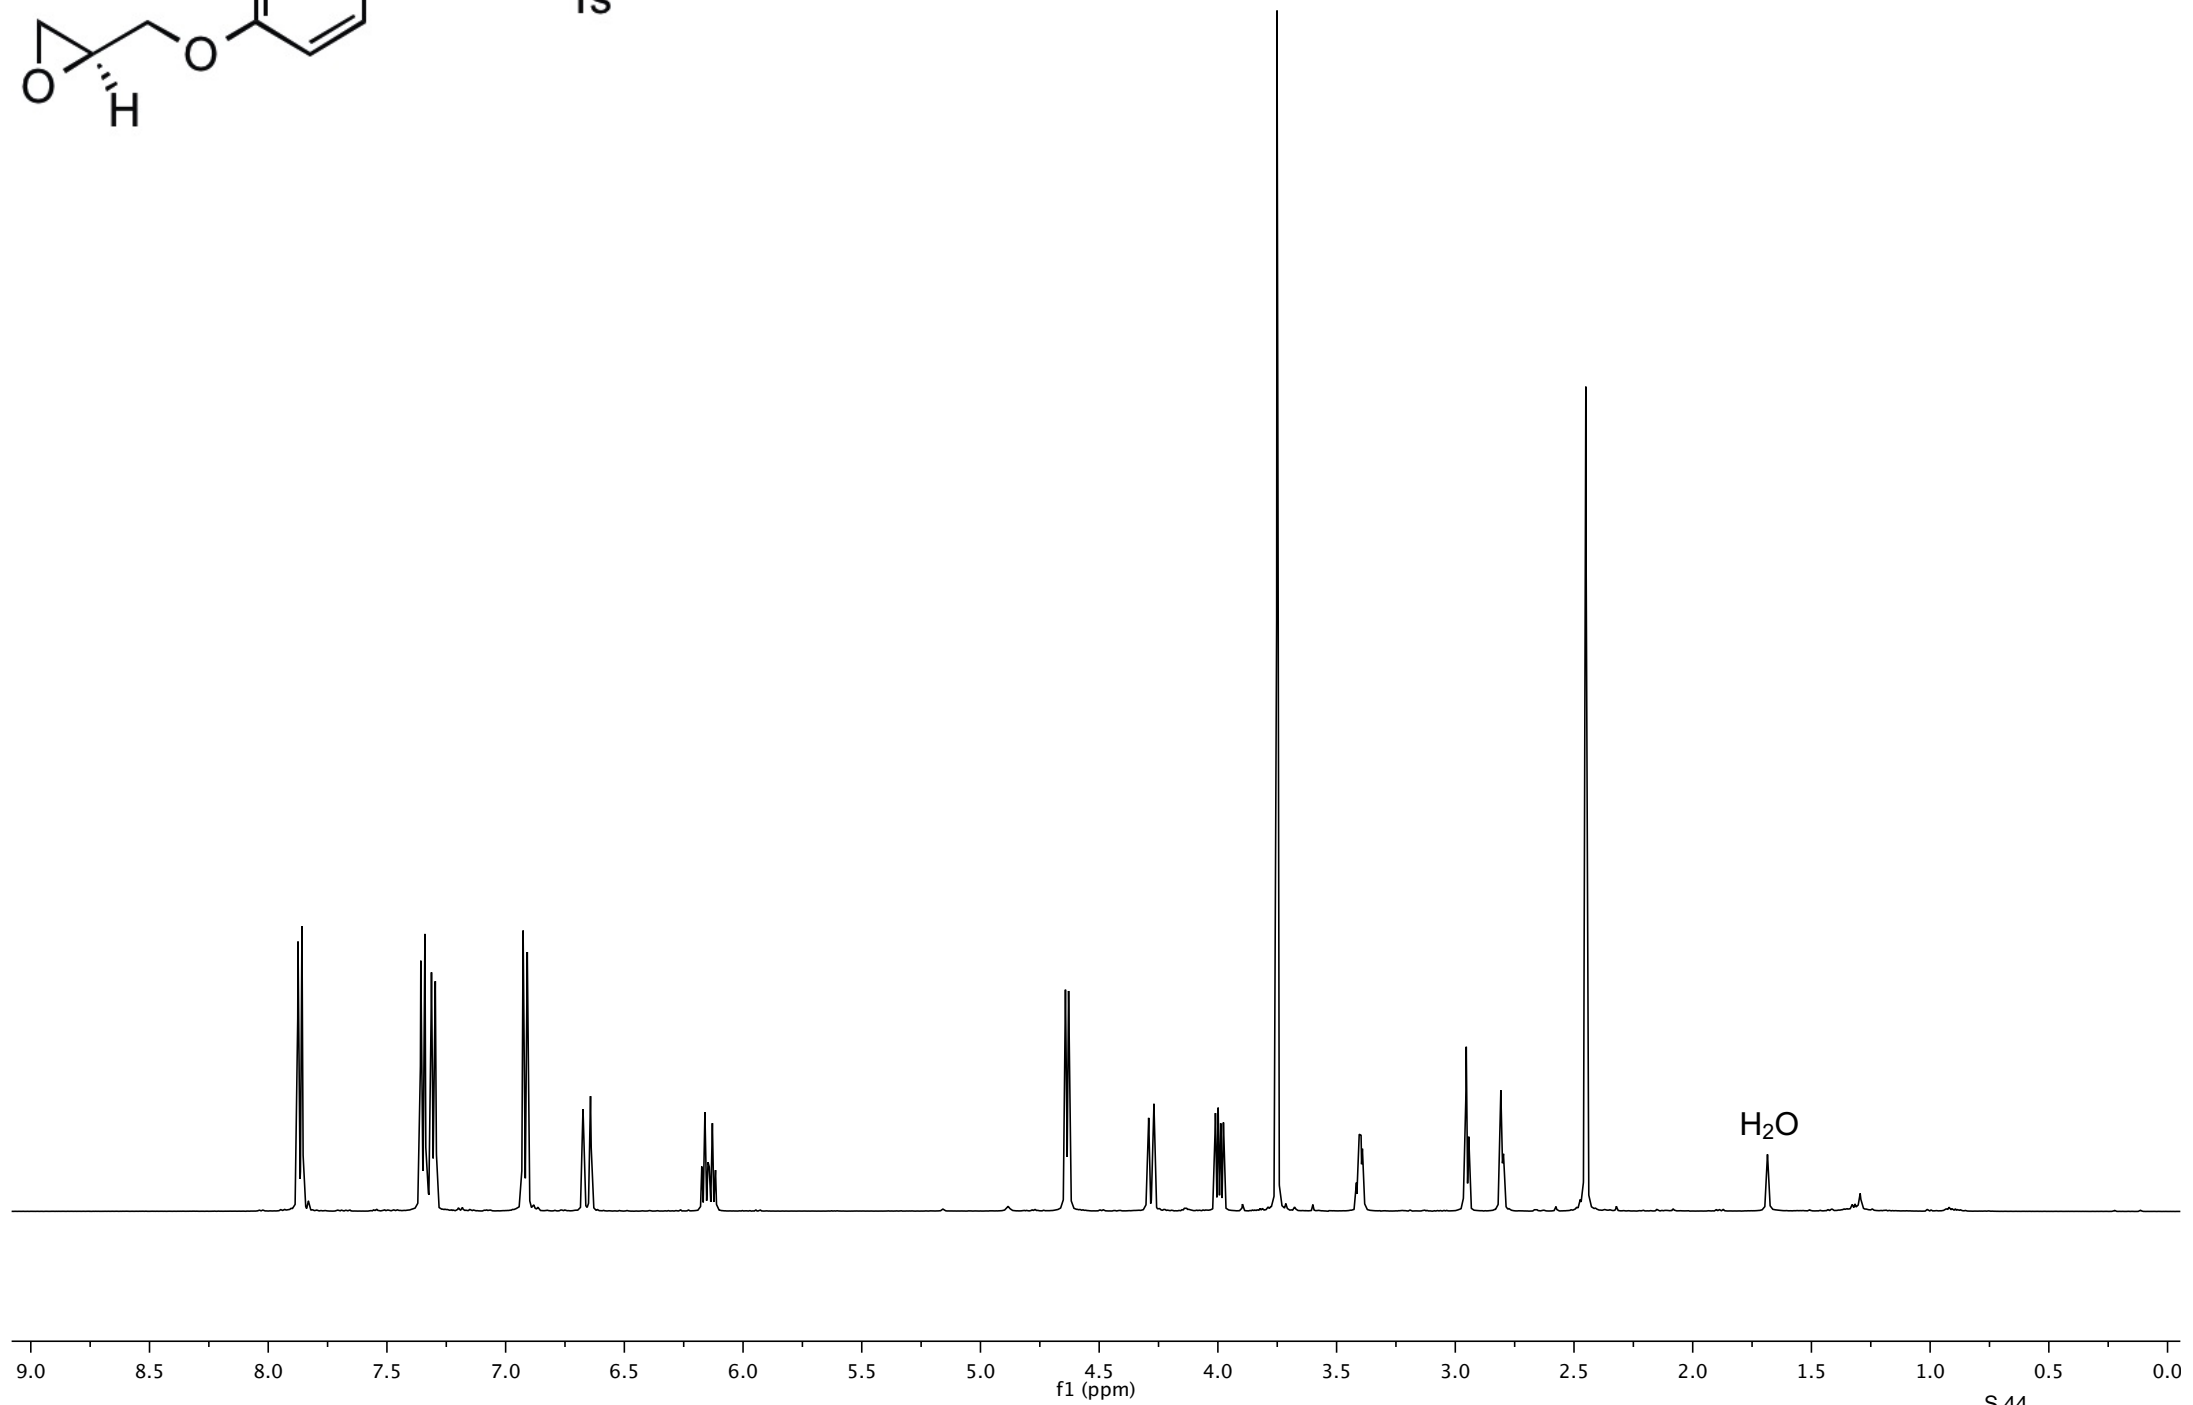

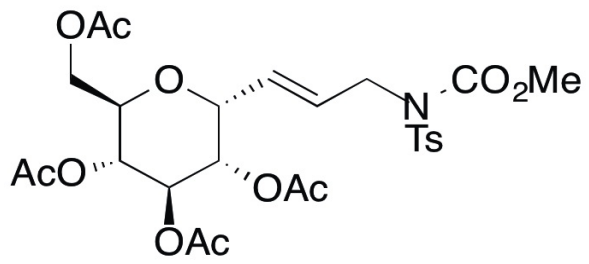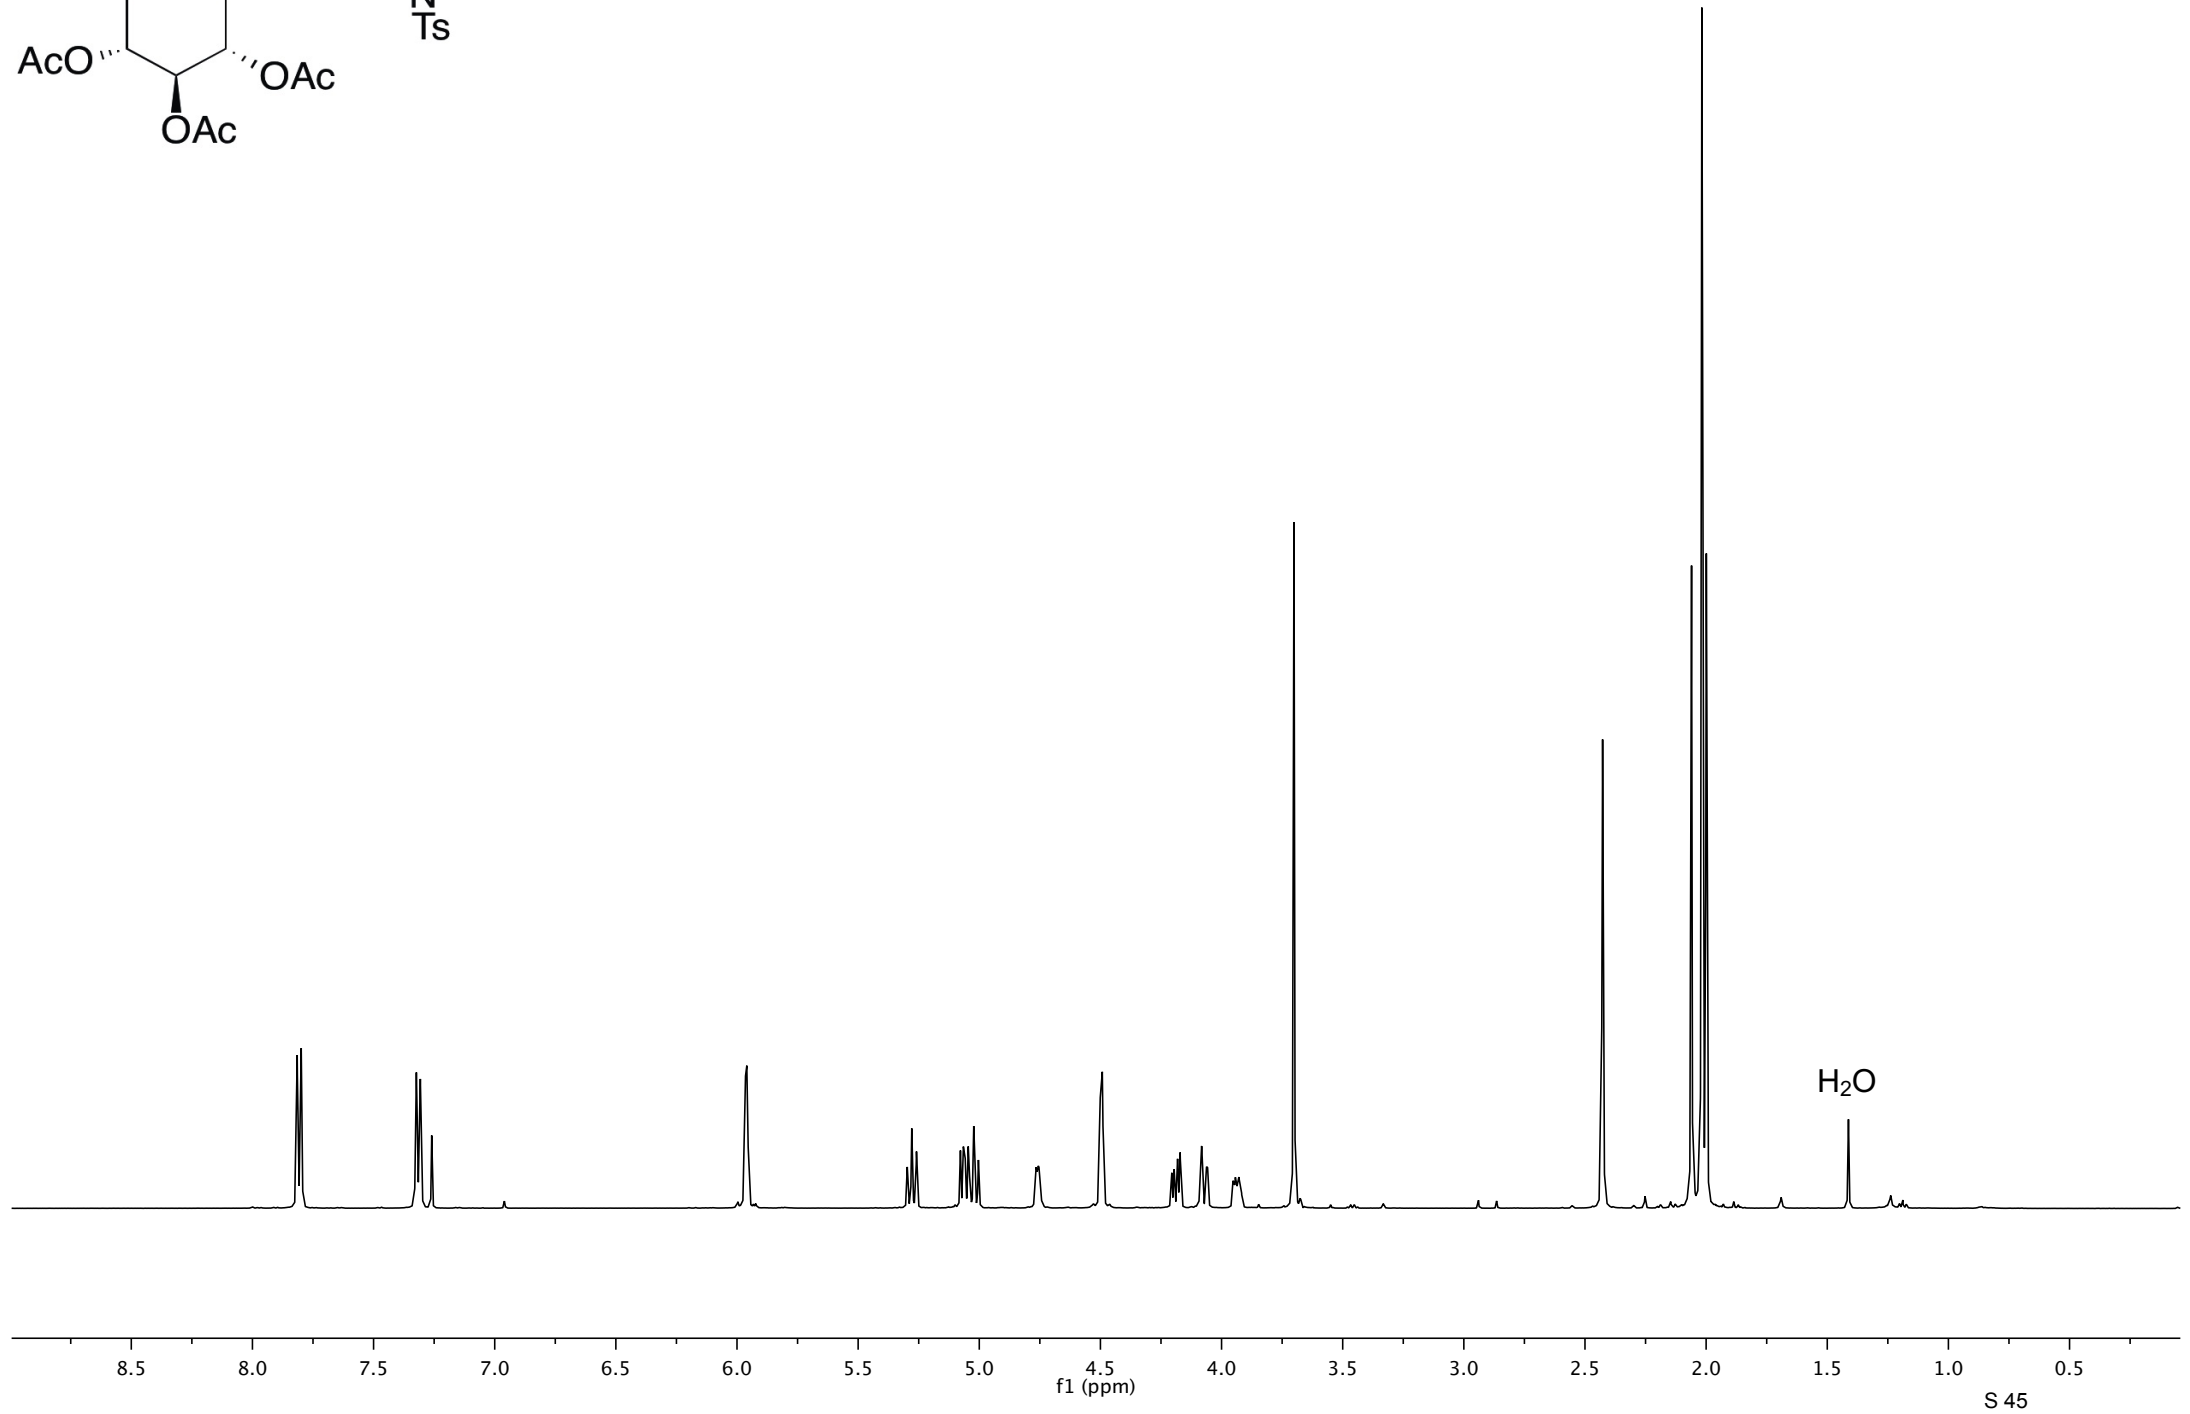

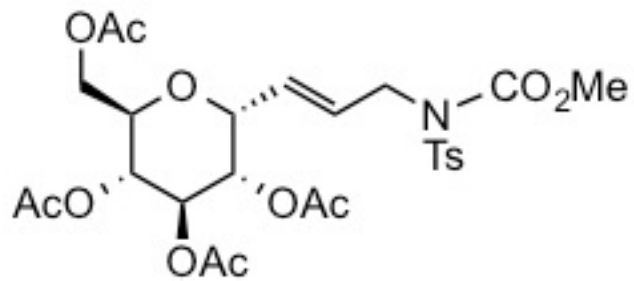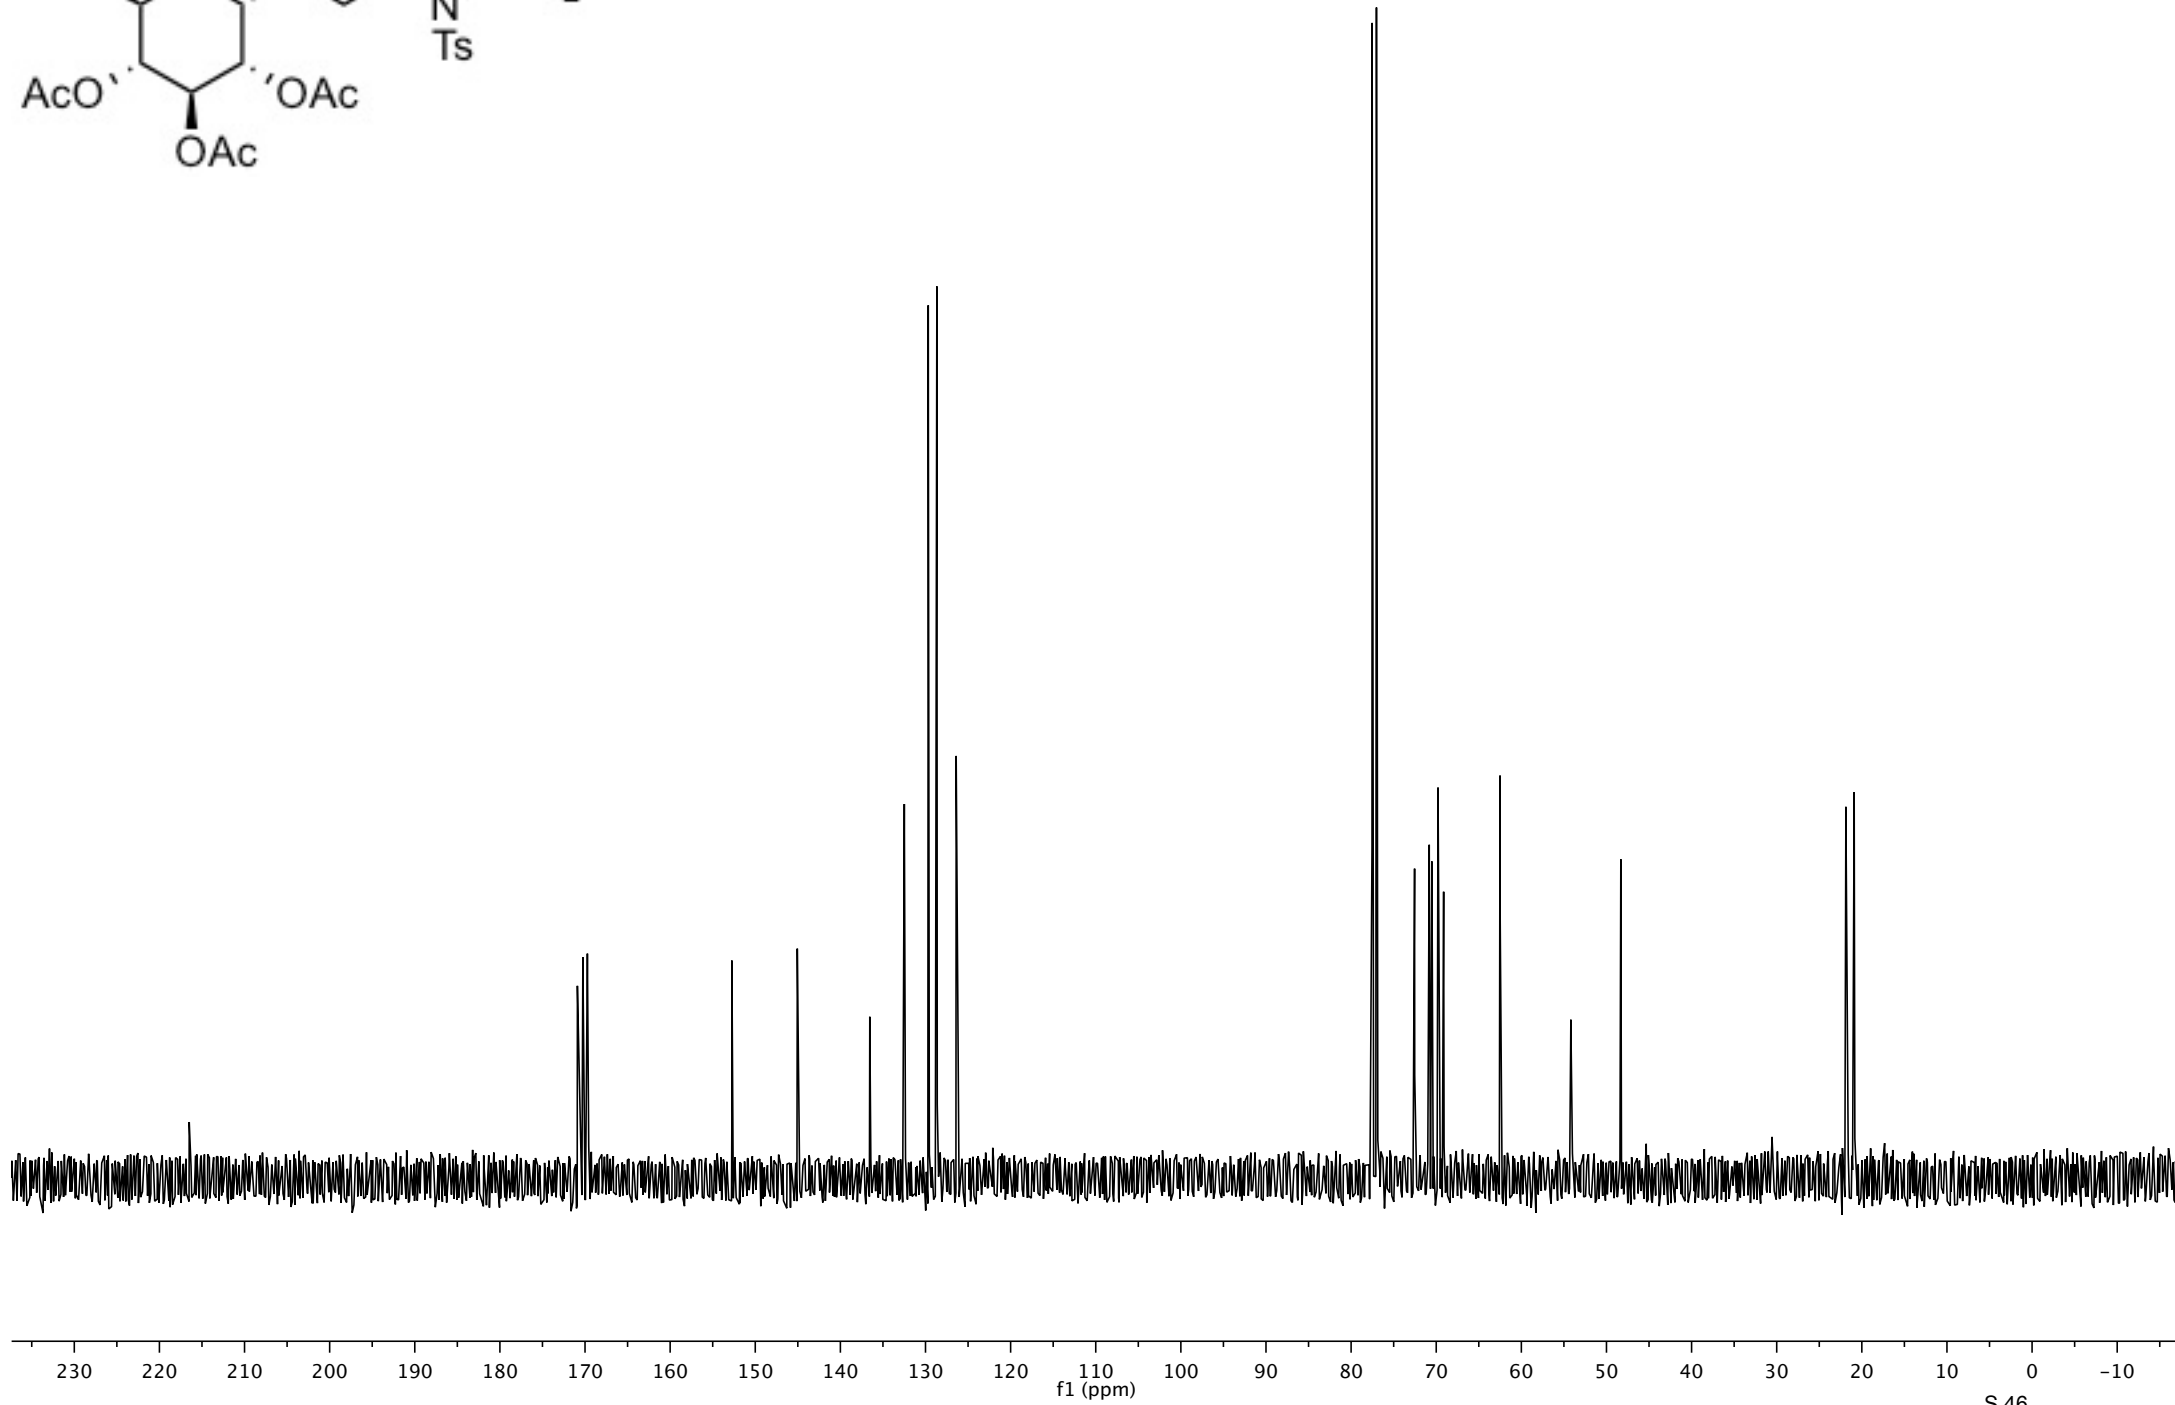



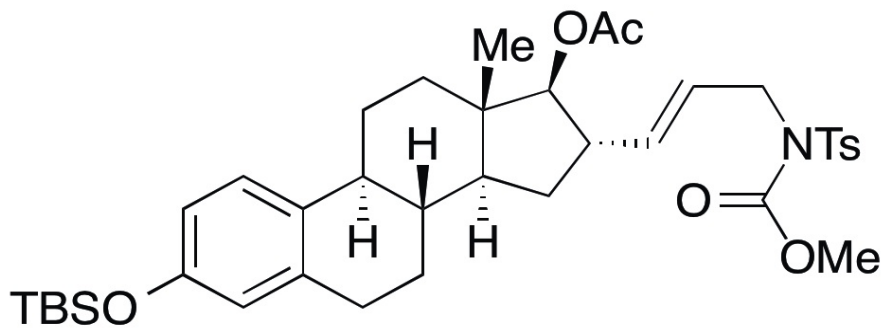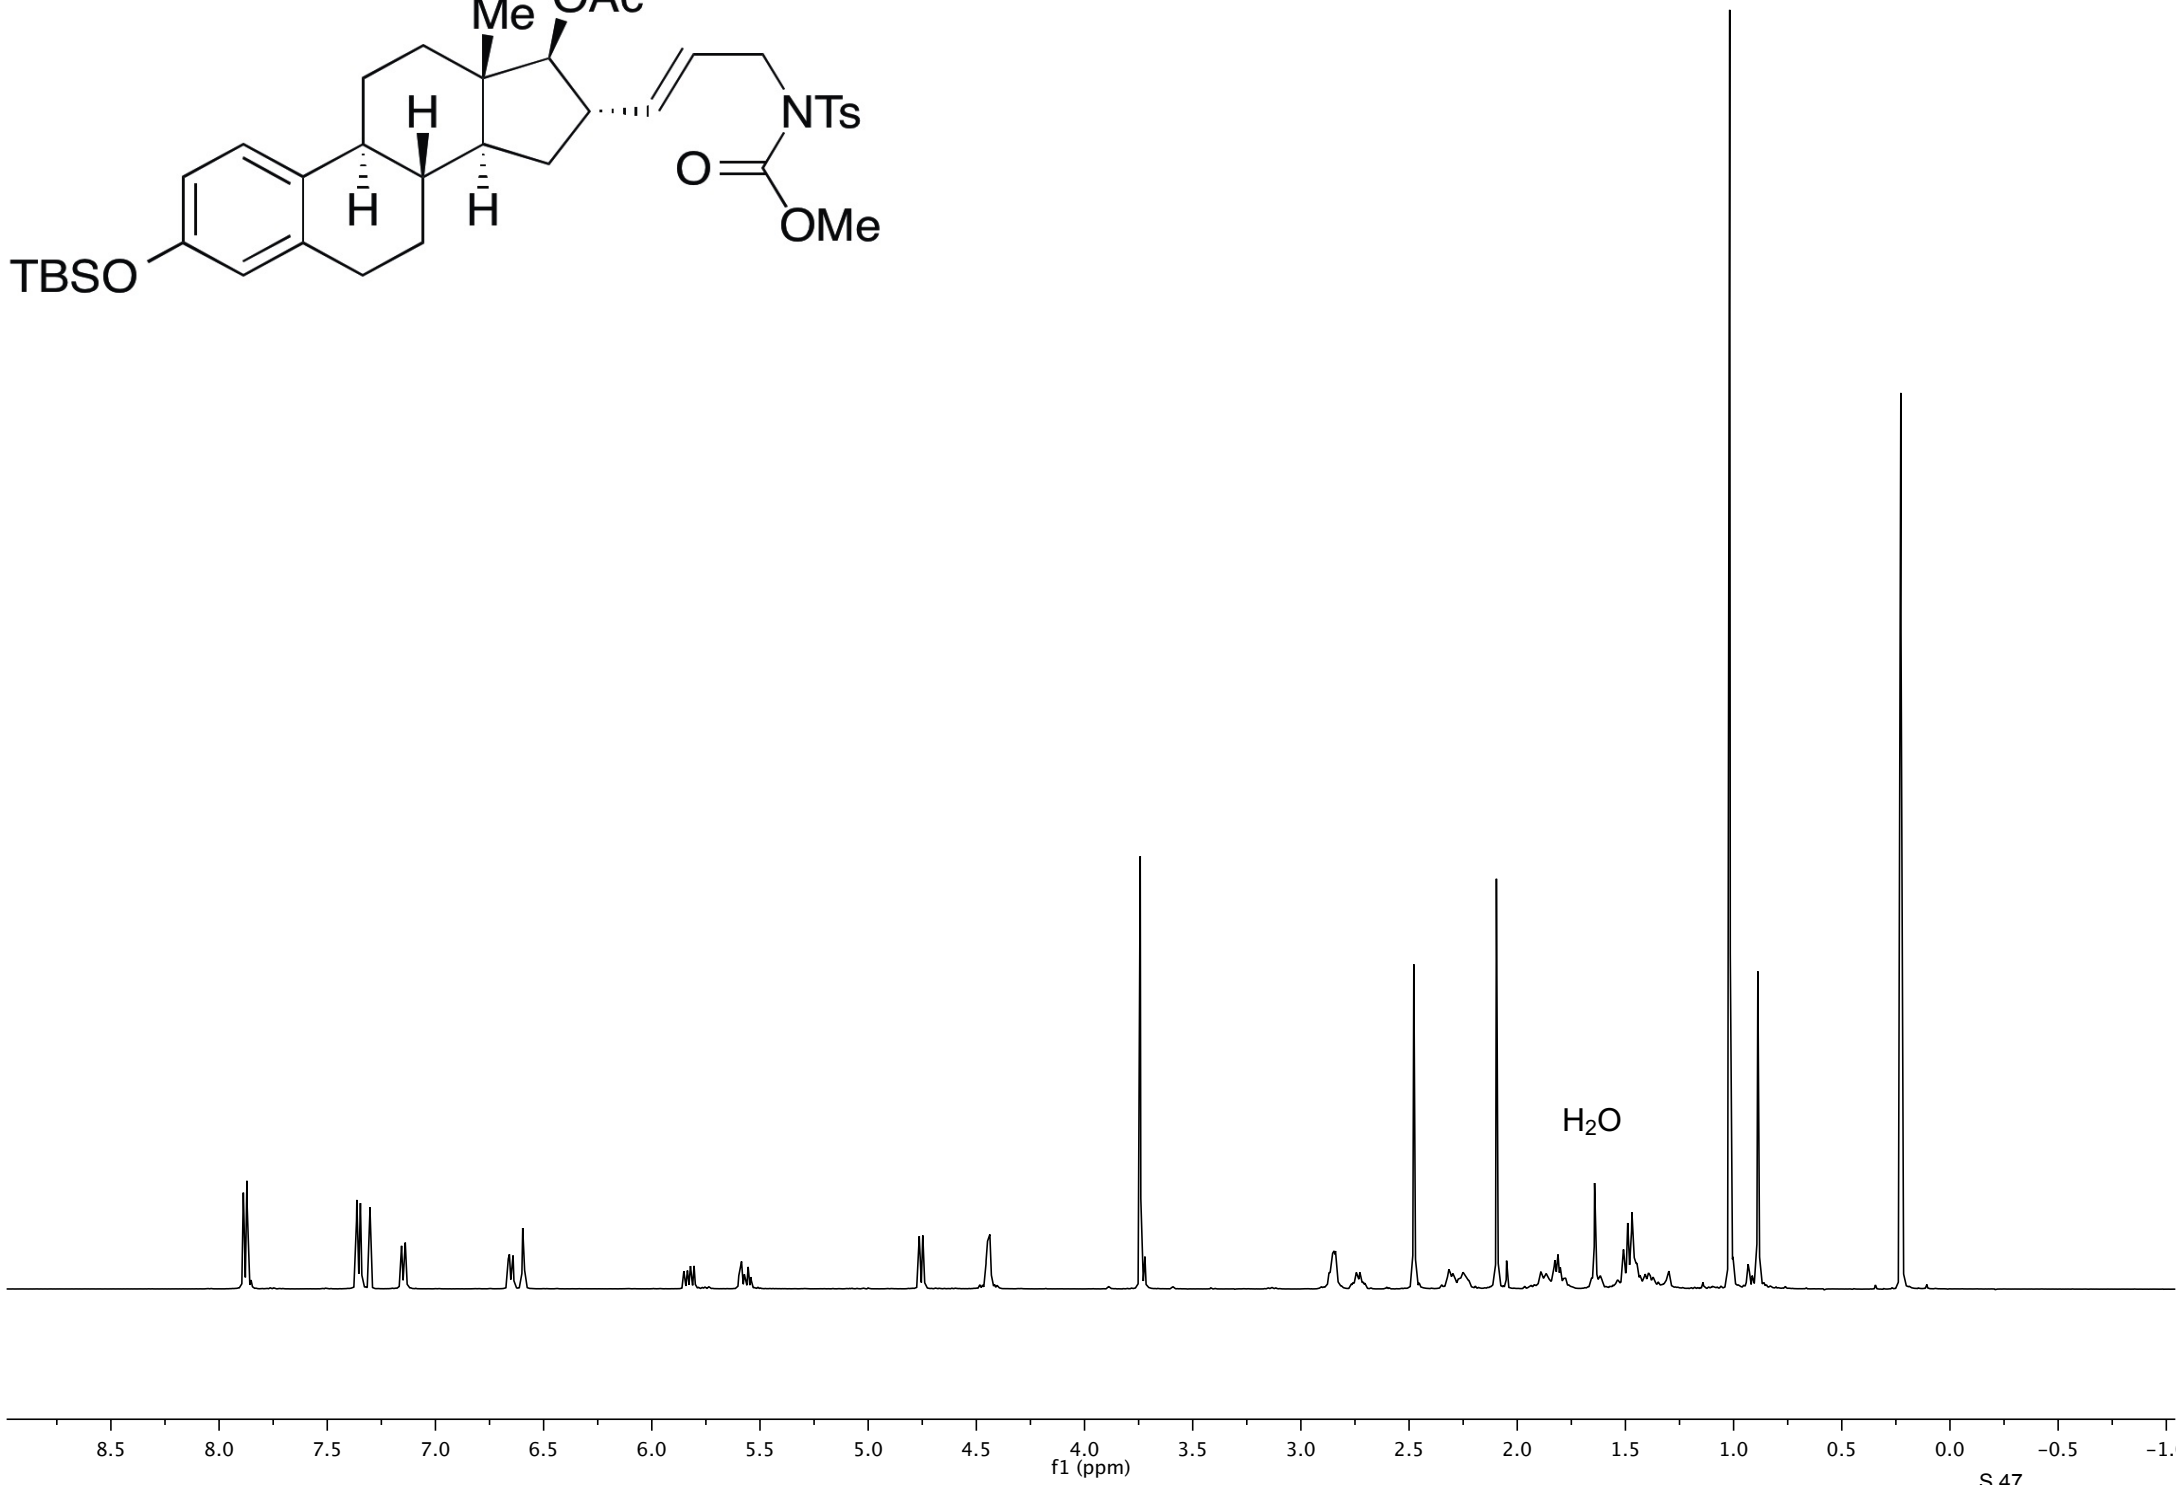



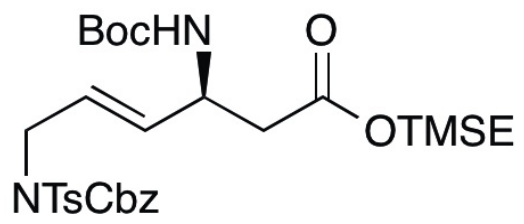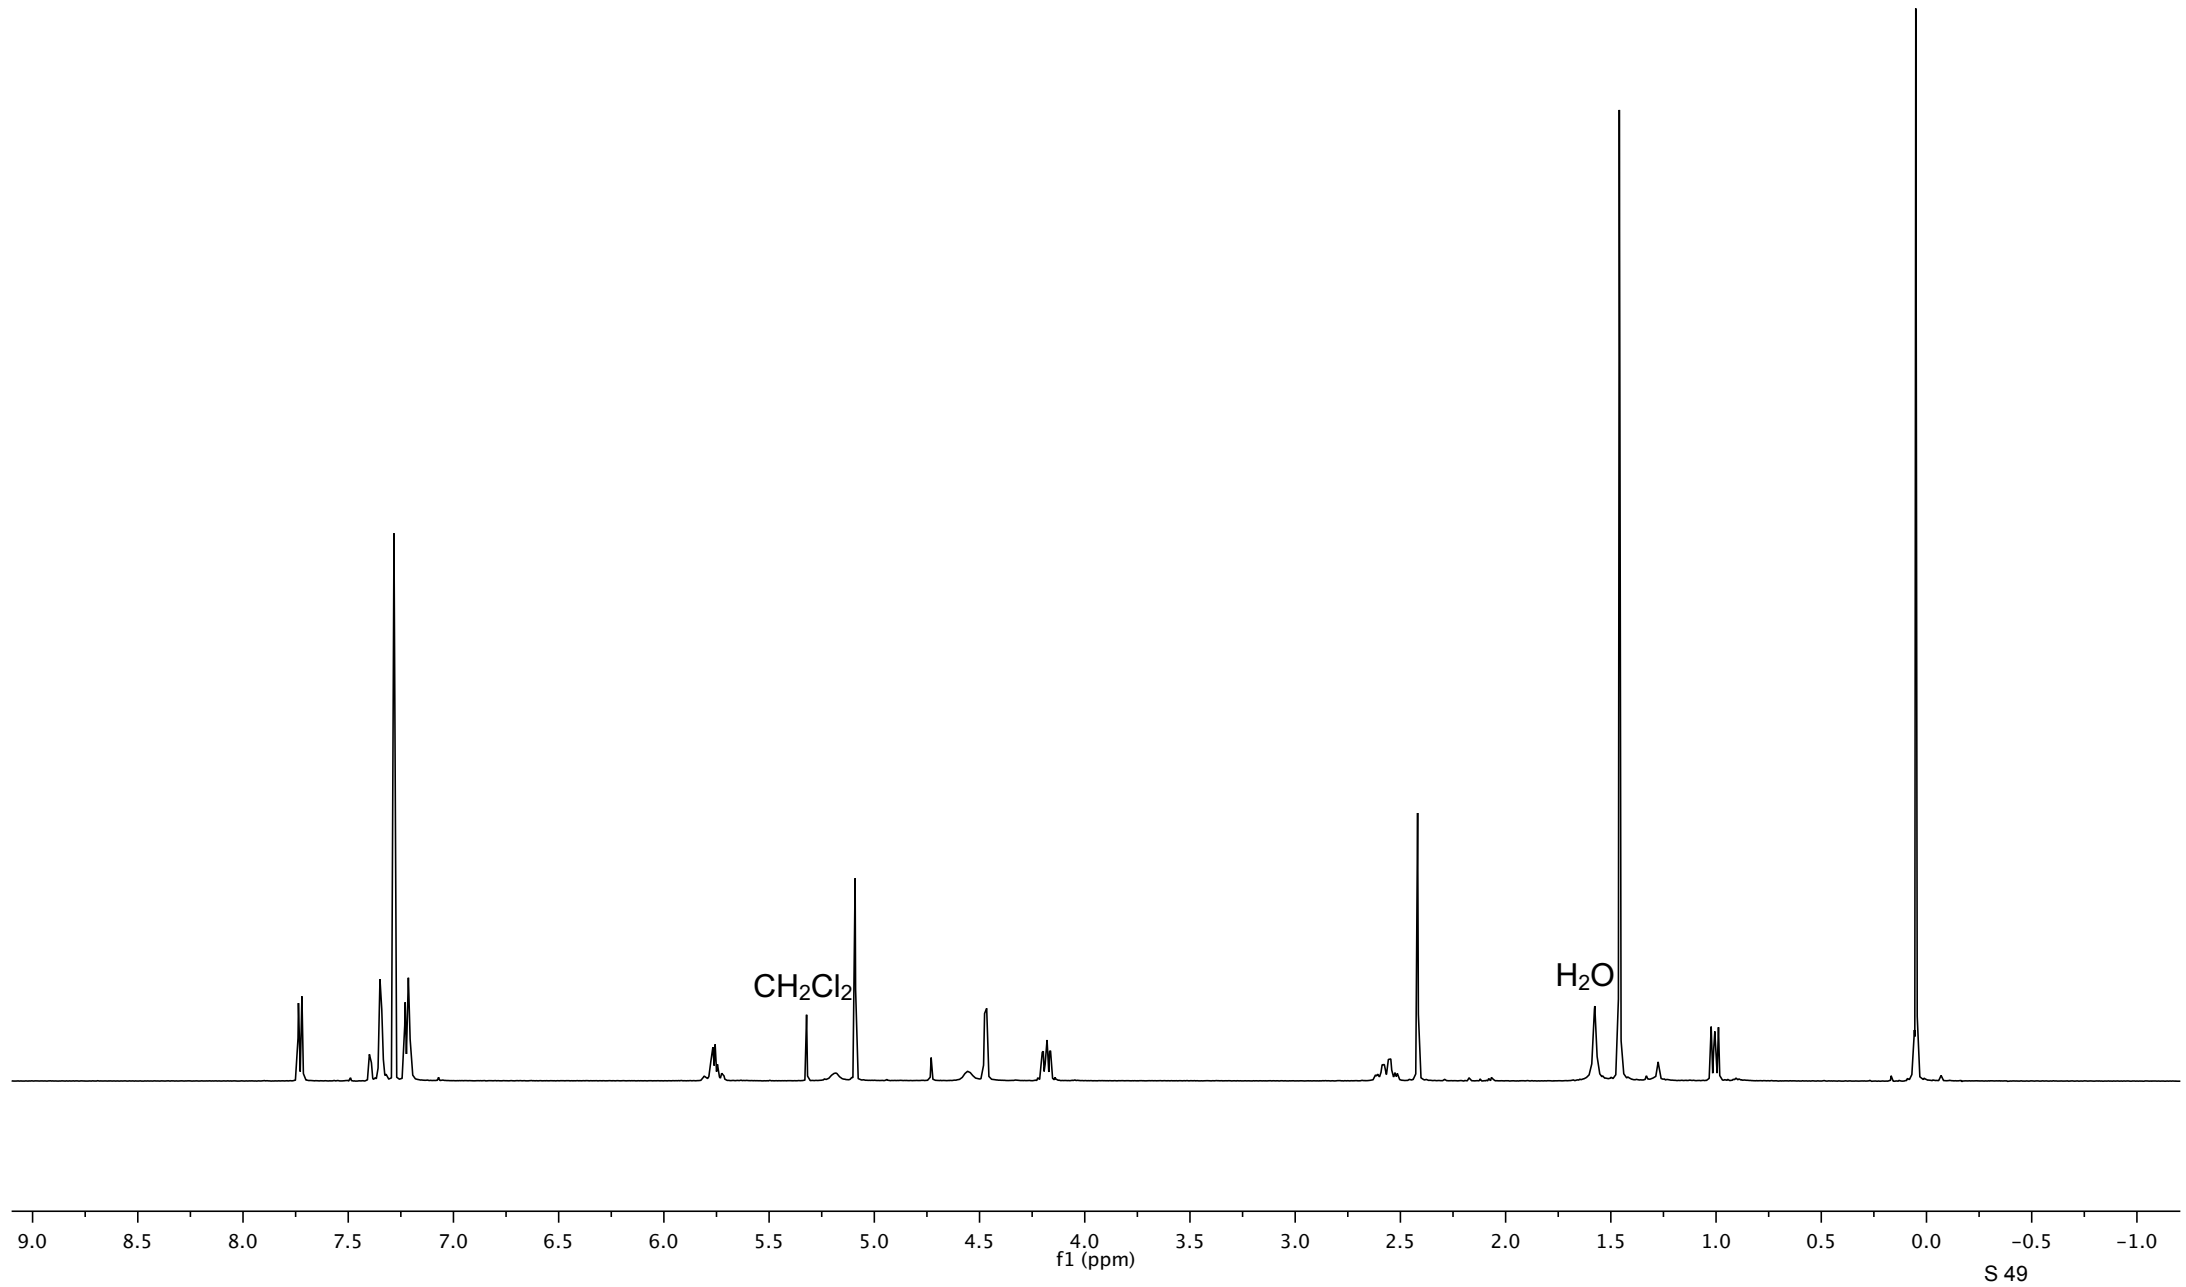

Supplement: NIHMS775405-supplement-Supporting_Information_2.pdf [file NIHMS775405-supplement-Supporting_Information_2.pdf]
